# Supplementary material for: Shotgun Proteomics of Co-Cultured Leukemic and Bone Marrow Stromal Cells from Different Species as a Preliminary Approach to Detect Intercellular Protein Transfer
Source: Proteomes. 2023 Apr 5;11(2):15. doi: 10.3390/proteomes11020015 (PMC10123657; doi:10.3390/proteomes11020015)

**Figure S1.** Quality control charts and statistics for mass spectrometry data.

Quality control graphs for proteins identified in the CCRF-CEM cells

Distribution of log2(LFQI)

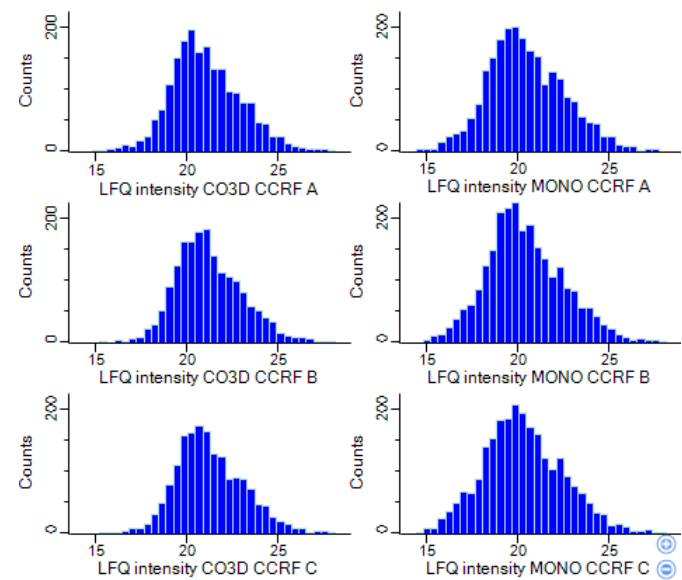

Principal component analysis (PCA)

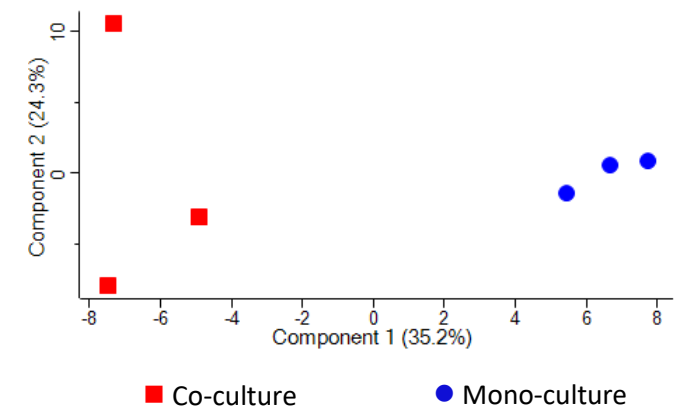

Multi scatter plot and Pearson correlation

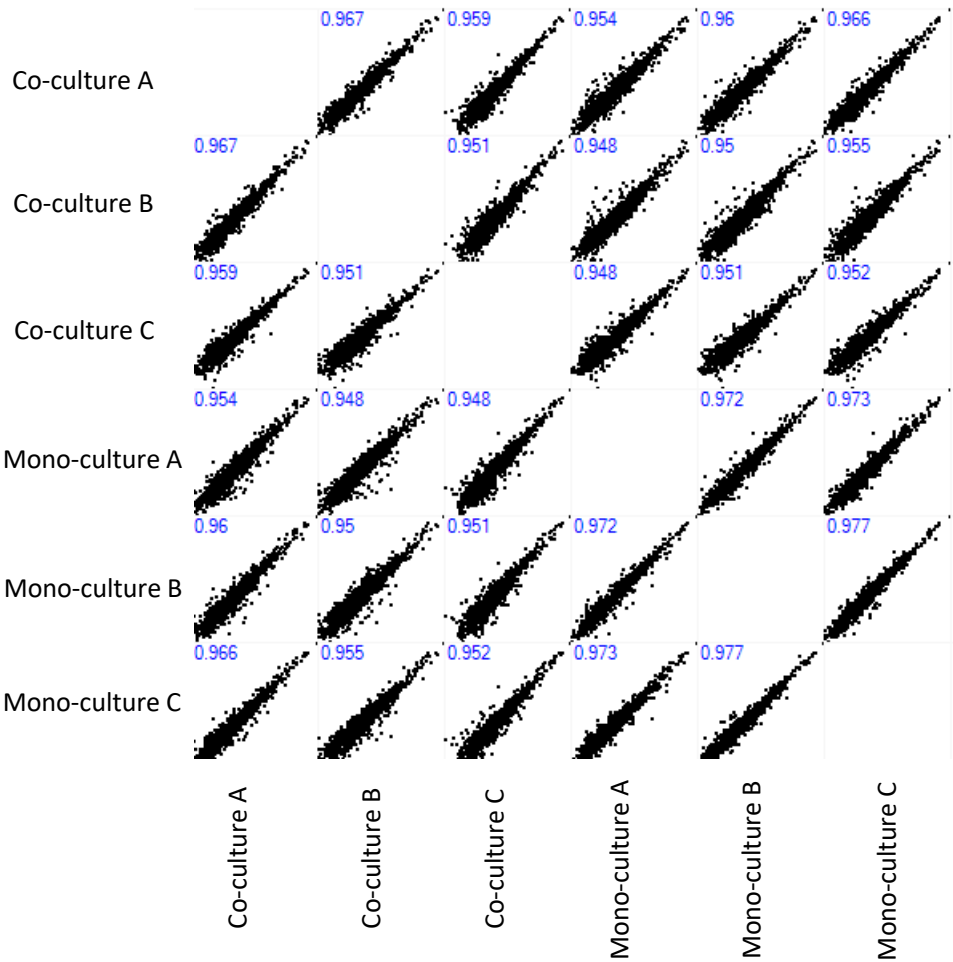

z-score normalization and heat map

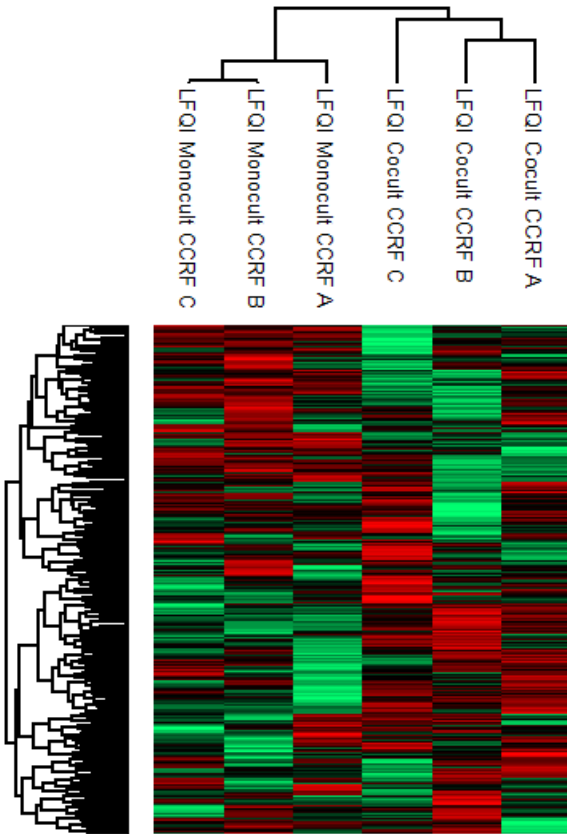

Quality control graphs for peptides identified in the CCRF-CEM cells

Distribution of log2(LFQI)

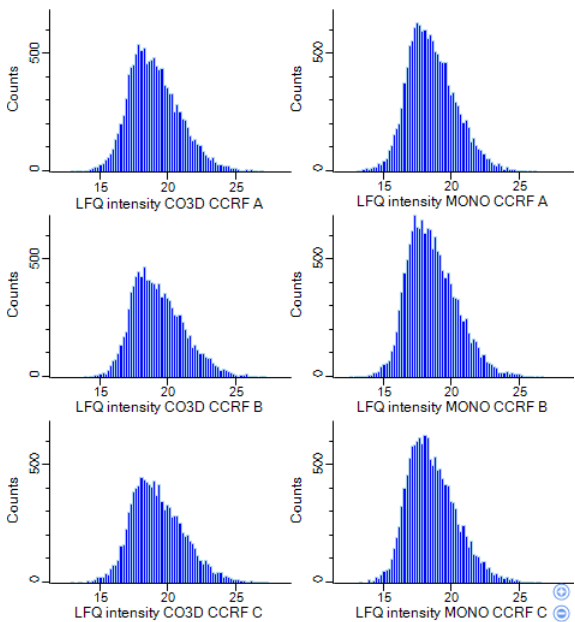

Principal component analysis (PCA)

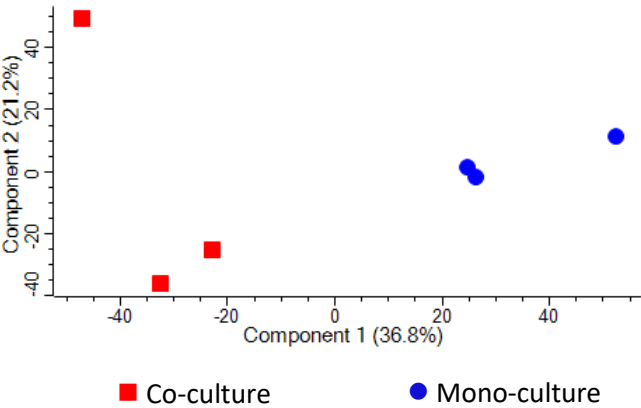

Multi scatter plot and Pearson correlation

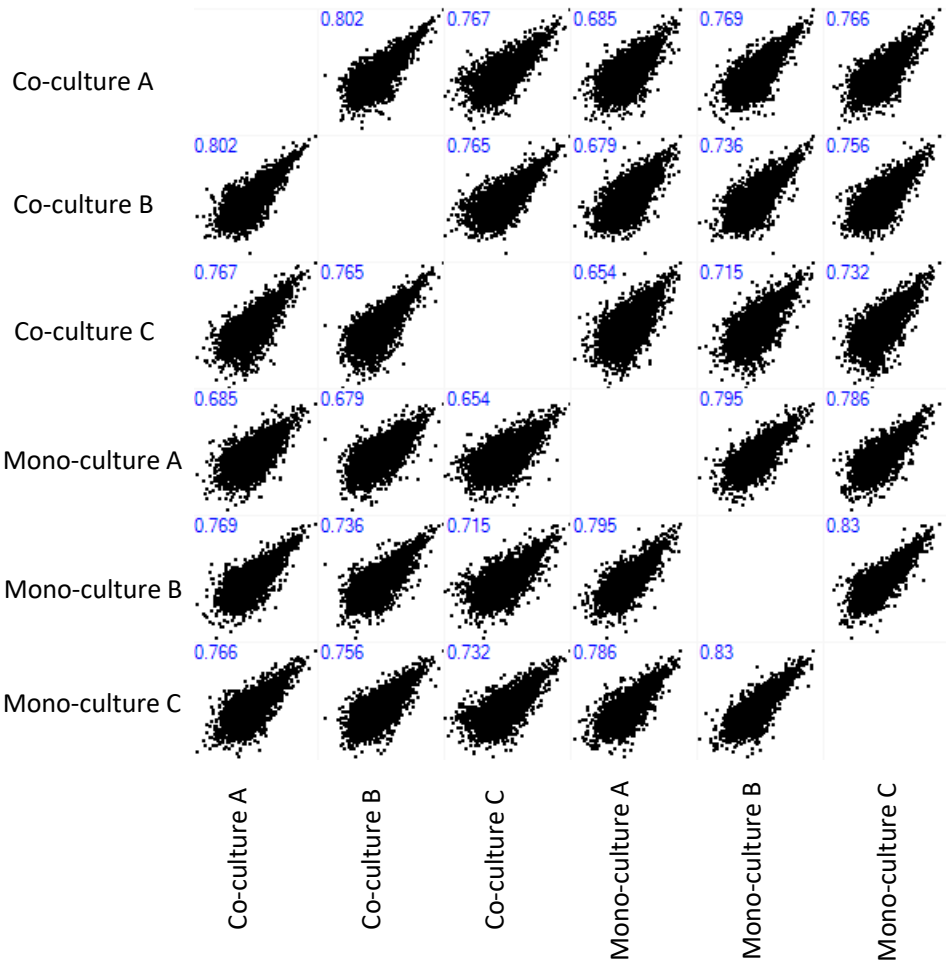

z-score normalization and heat map

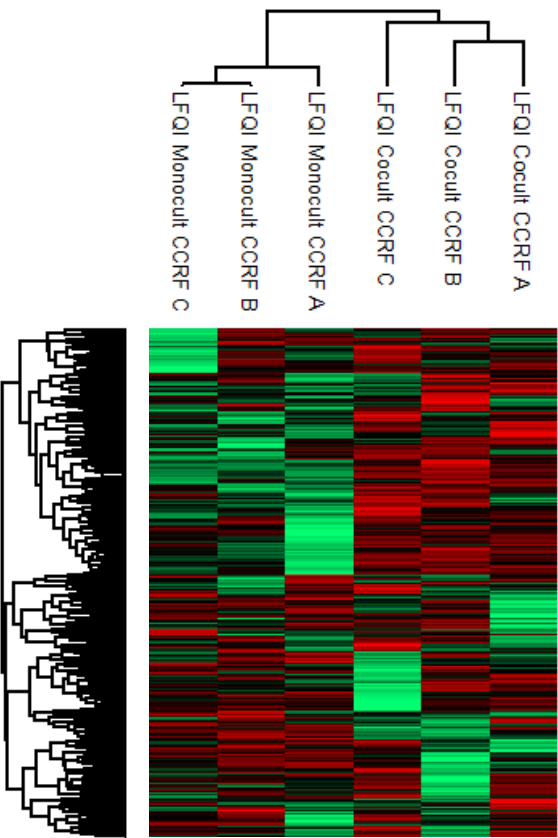

# Quality control graphs for the 209 mouse peptides identified in human CCRF-CEM

## Distribution of log<sub>2</sub>(LFQI)

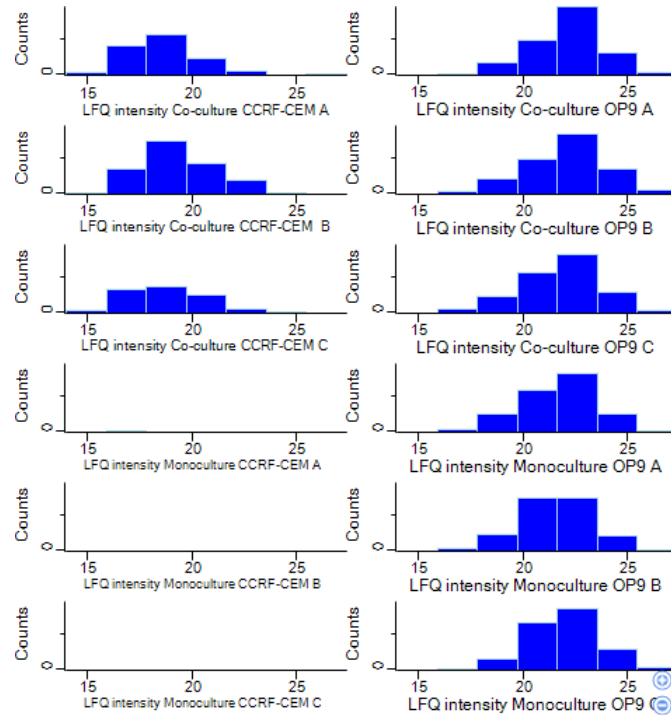

## Principal component analysis (PCA)

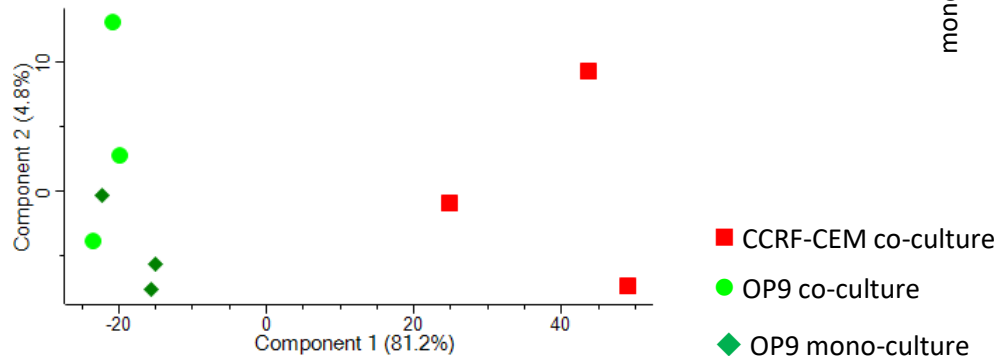

## Multi scatter plot and Pearson correlation

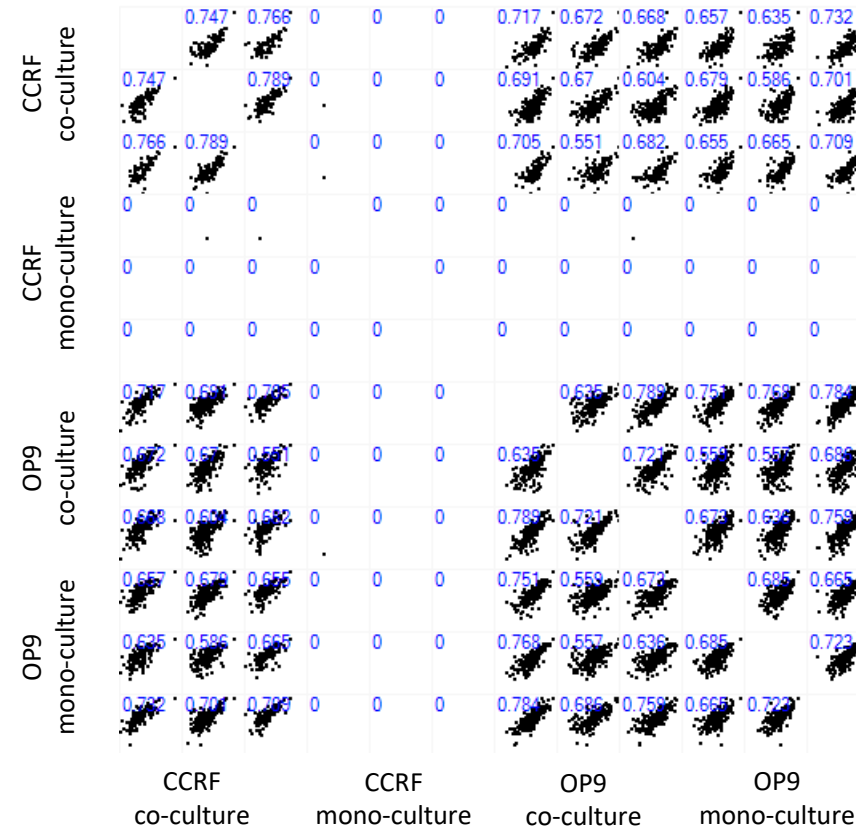

## z-score normalization and heat map

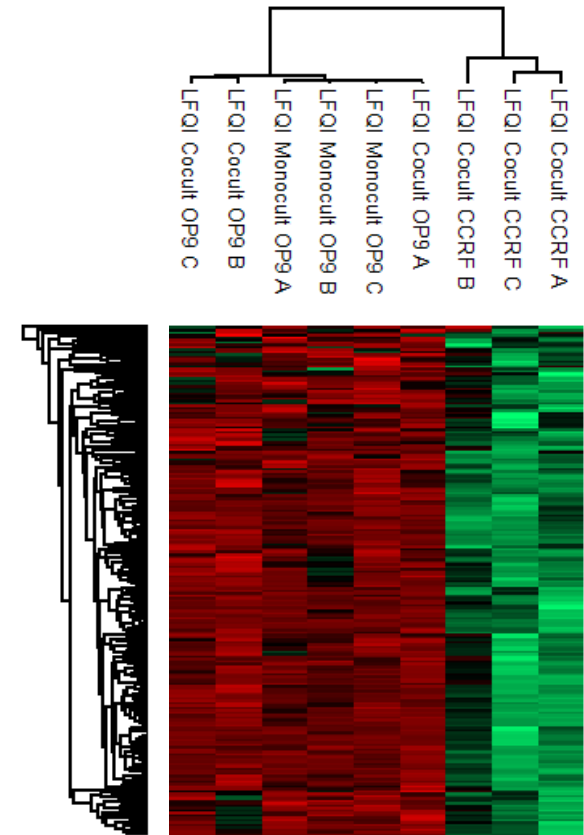

Plot of covariances of the label free quantification intensity values of proteins identified in the CCRF-CEM cells

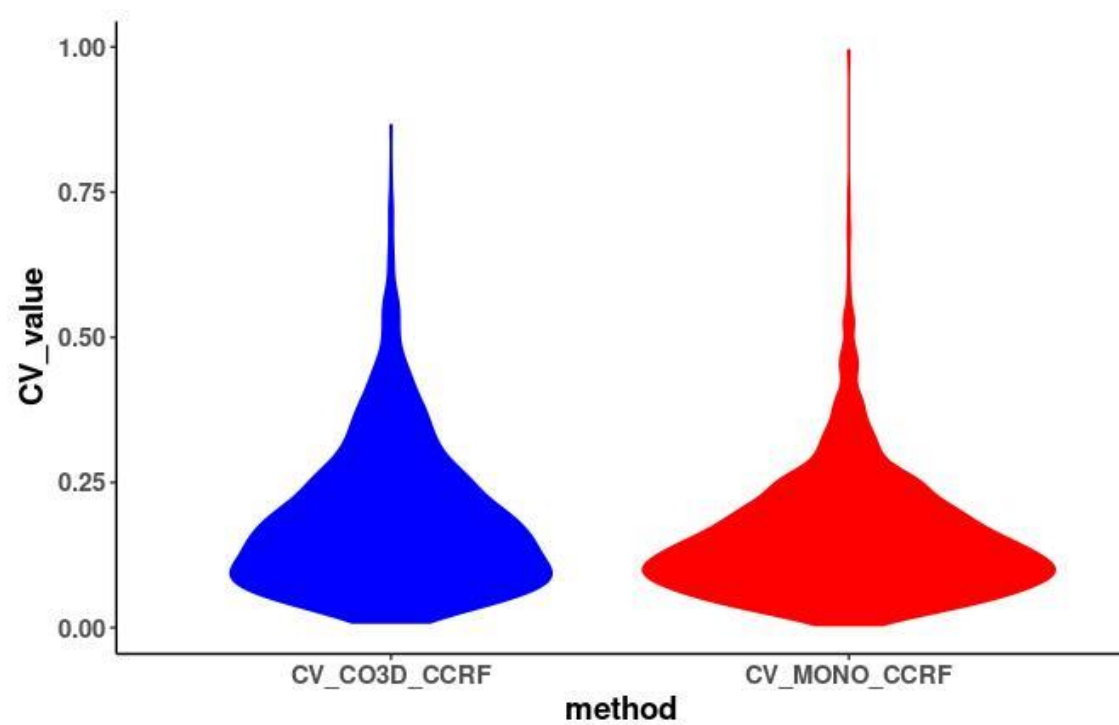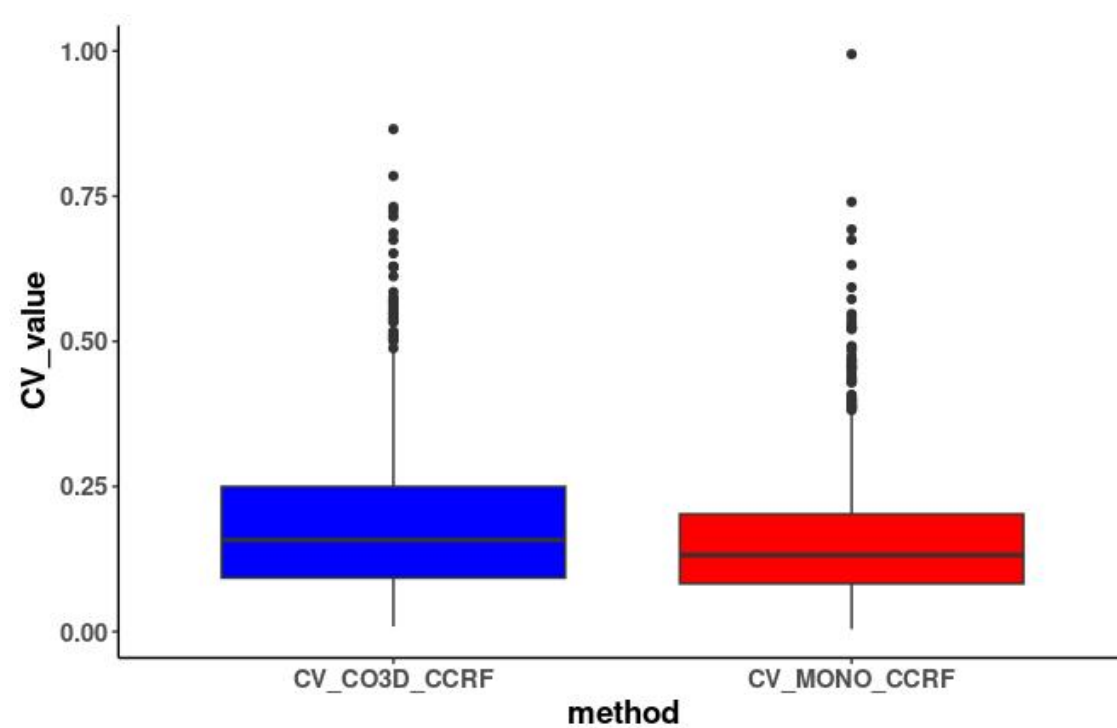

# MS/MS spectra of selected mouse peptides detected in the suspension of co-cultued CCRF-CEM cells

In the sequences of mouse peptides, the residues in bold letters are different between the closest mouse and human peptides, and underlined residues were detected as y or b ions.

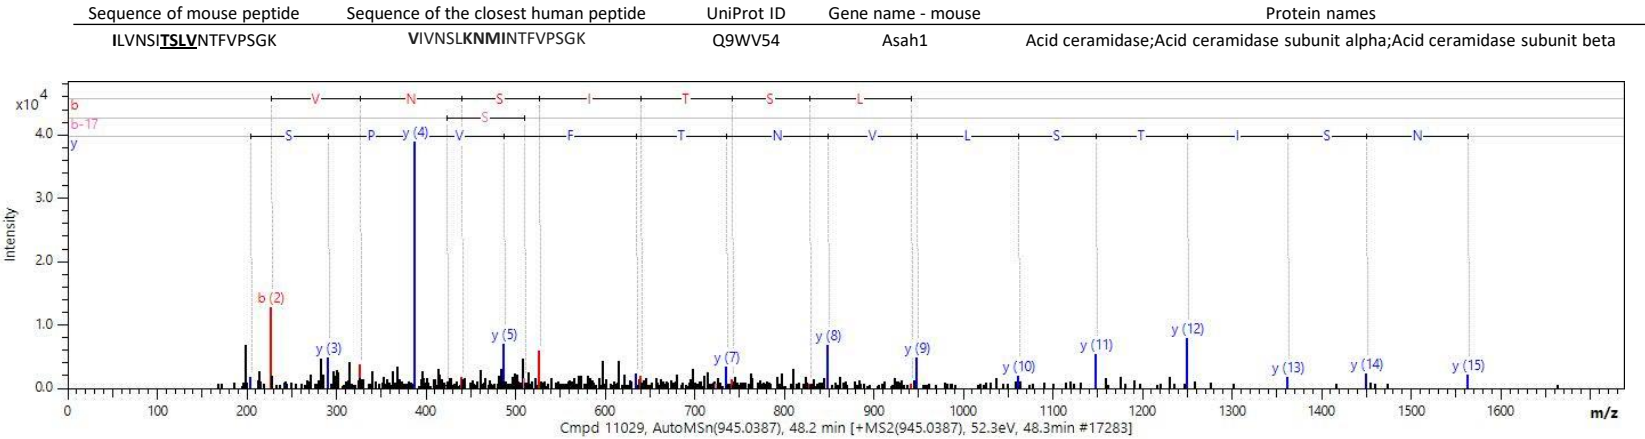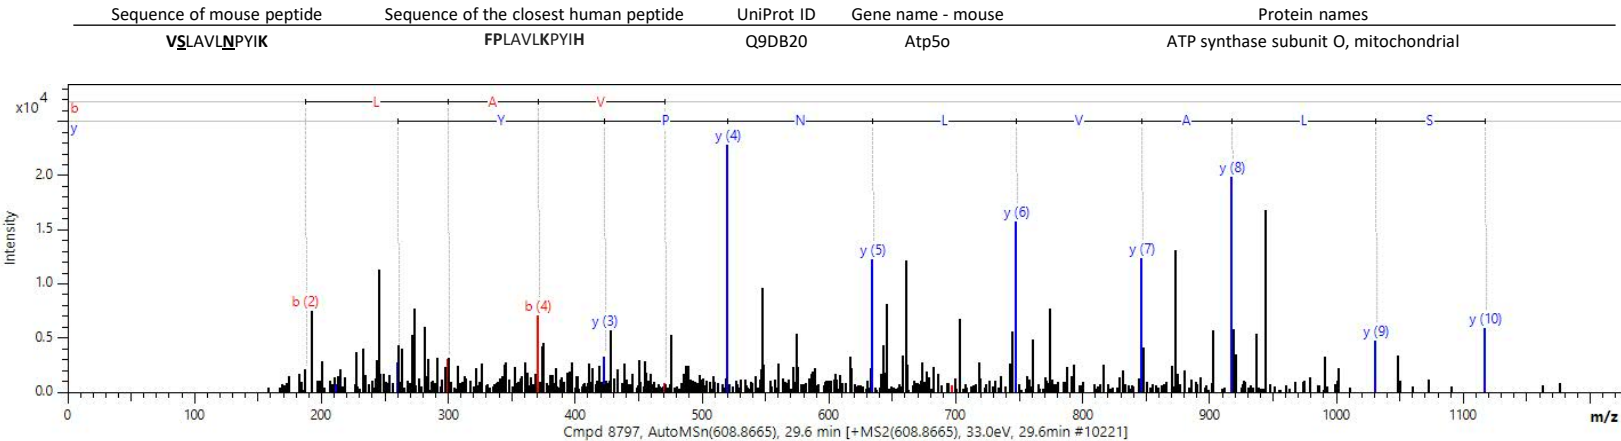

MS/MS spectra of selected mouse peptides detected in the suspension of co-cultued CCRF-CEM cells

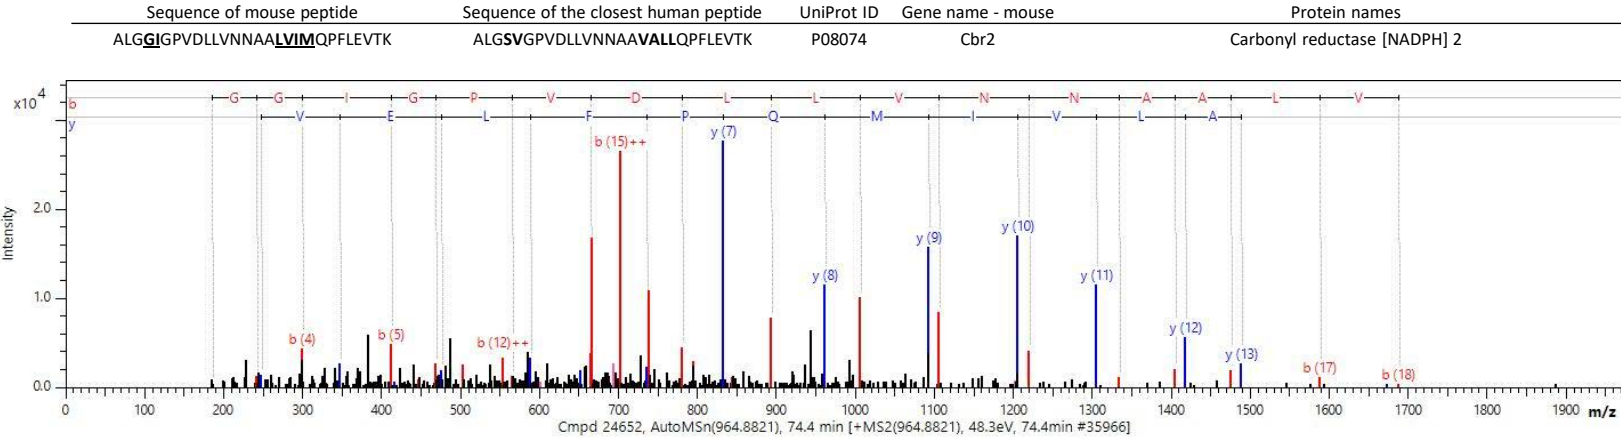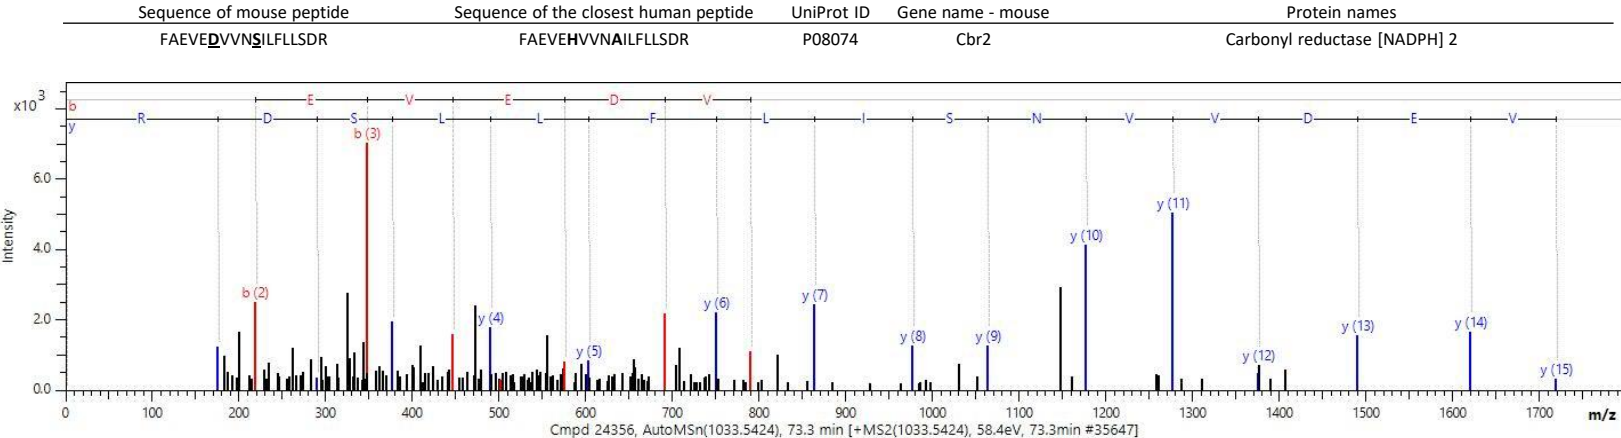

MS/MS spectra of selected mouse peptides detected in the suspension of co-cultured CCRF-CEM cells

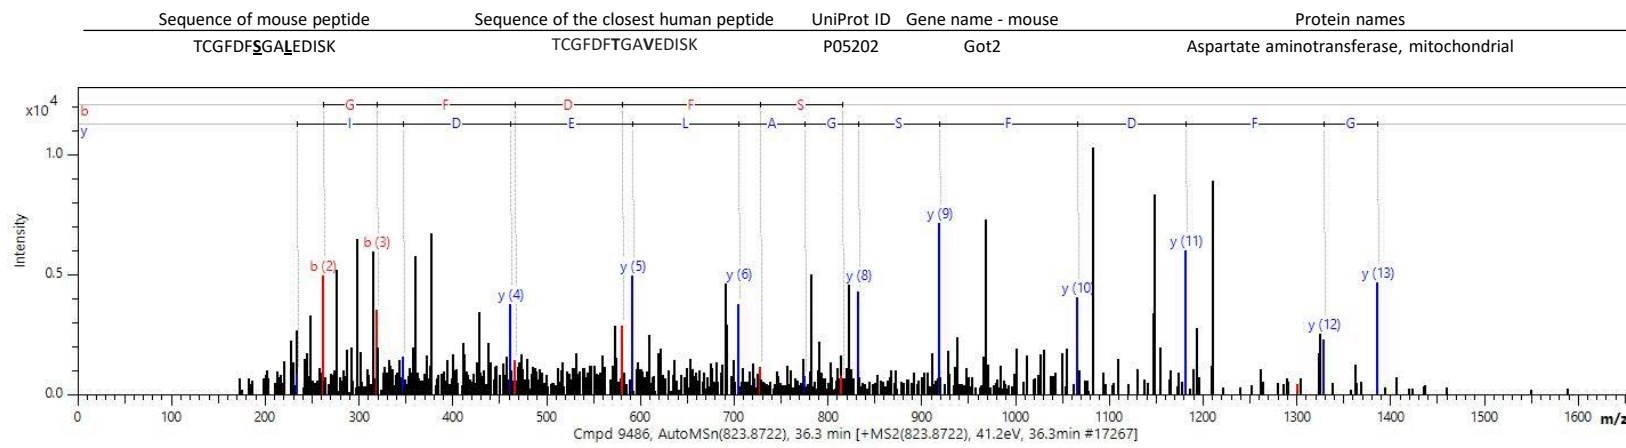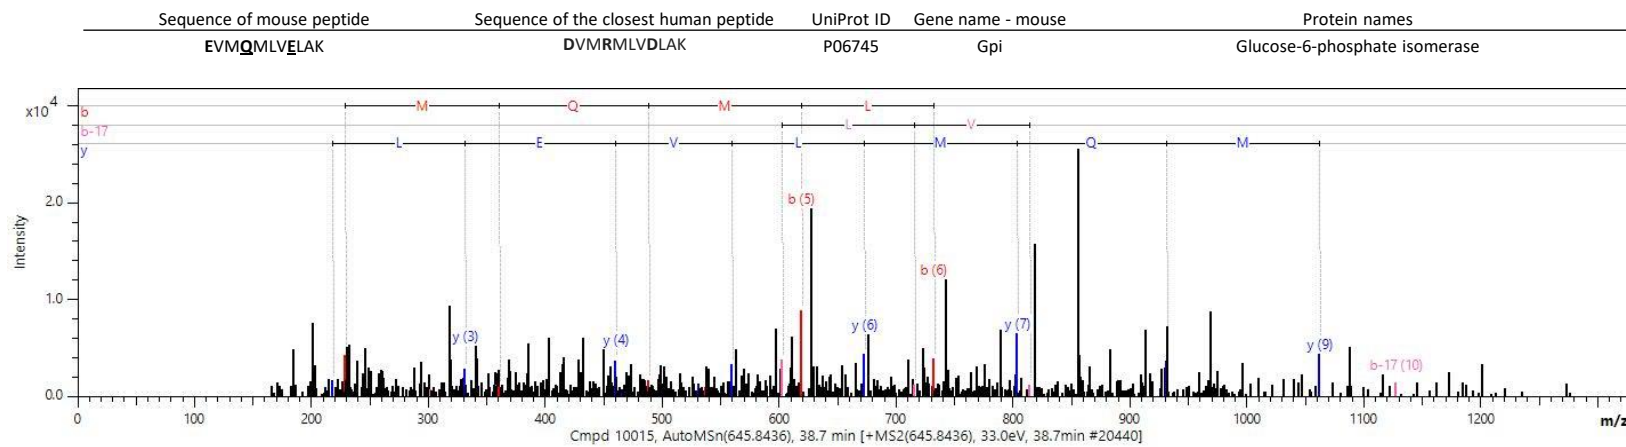

MS/MS spectra of selected mouse peptides detected in the suspension of co-cultured CCRF-CEM cells

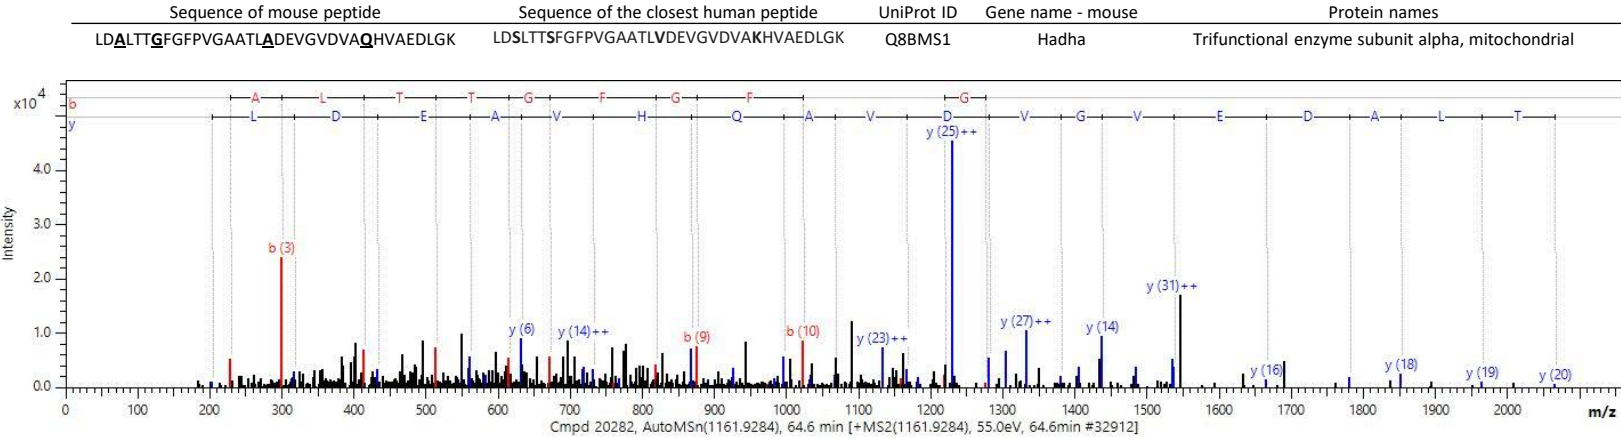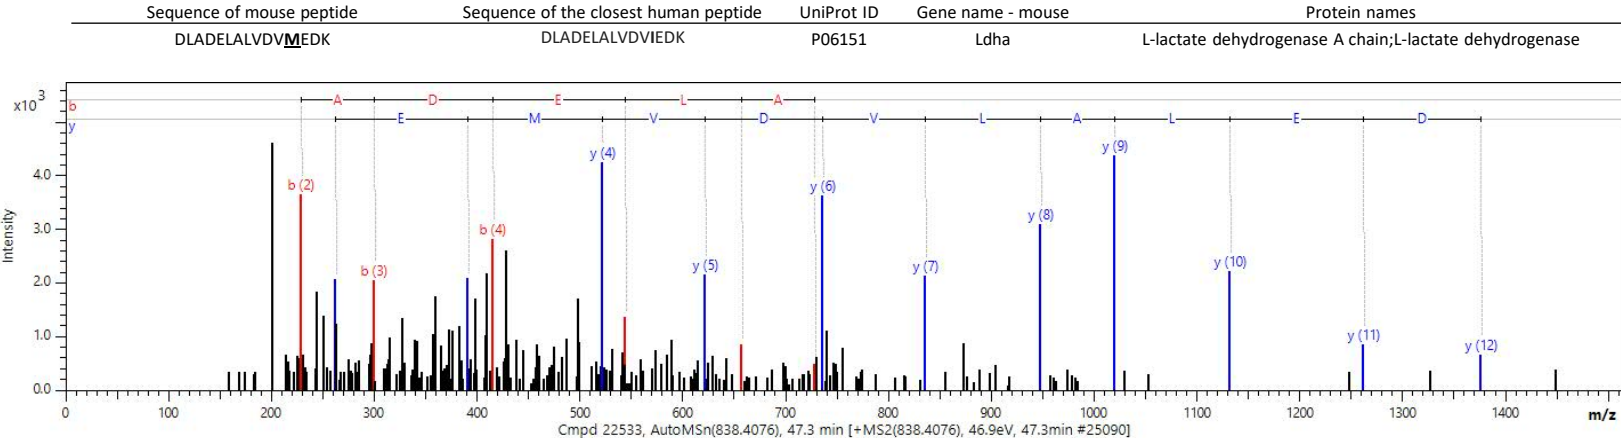

MS/MS spectra of selected mouse peptides detected in the suspension of co-cultued CCRF-CEM cells

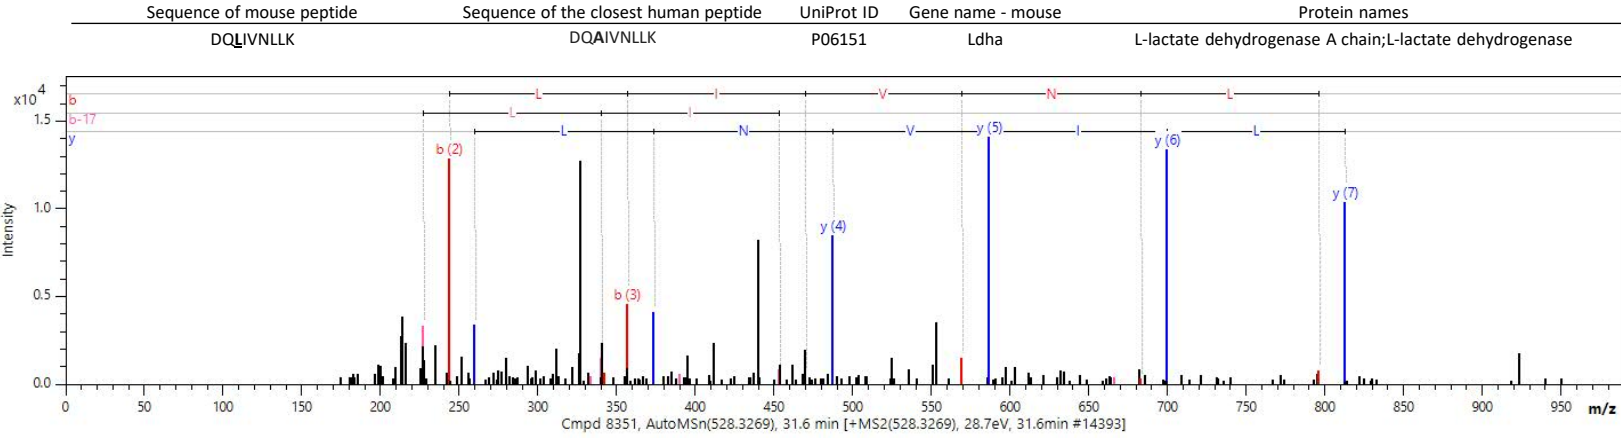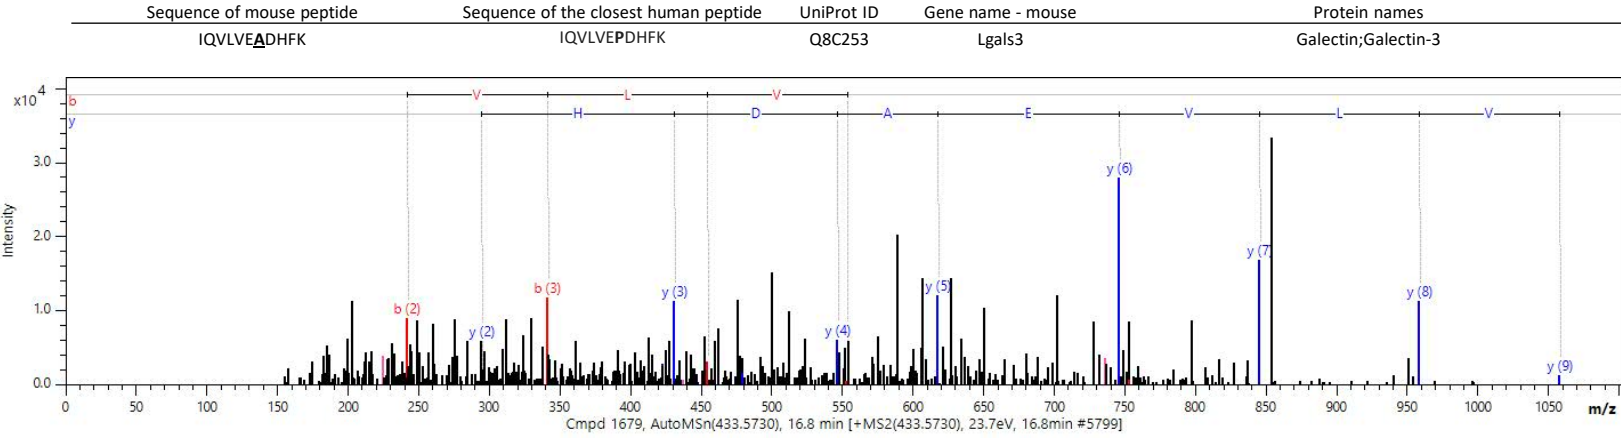

MS/MS spectra of selected mouse peptides detected in the suspension of co-cultued CCRF-CEM cells

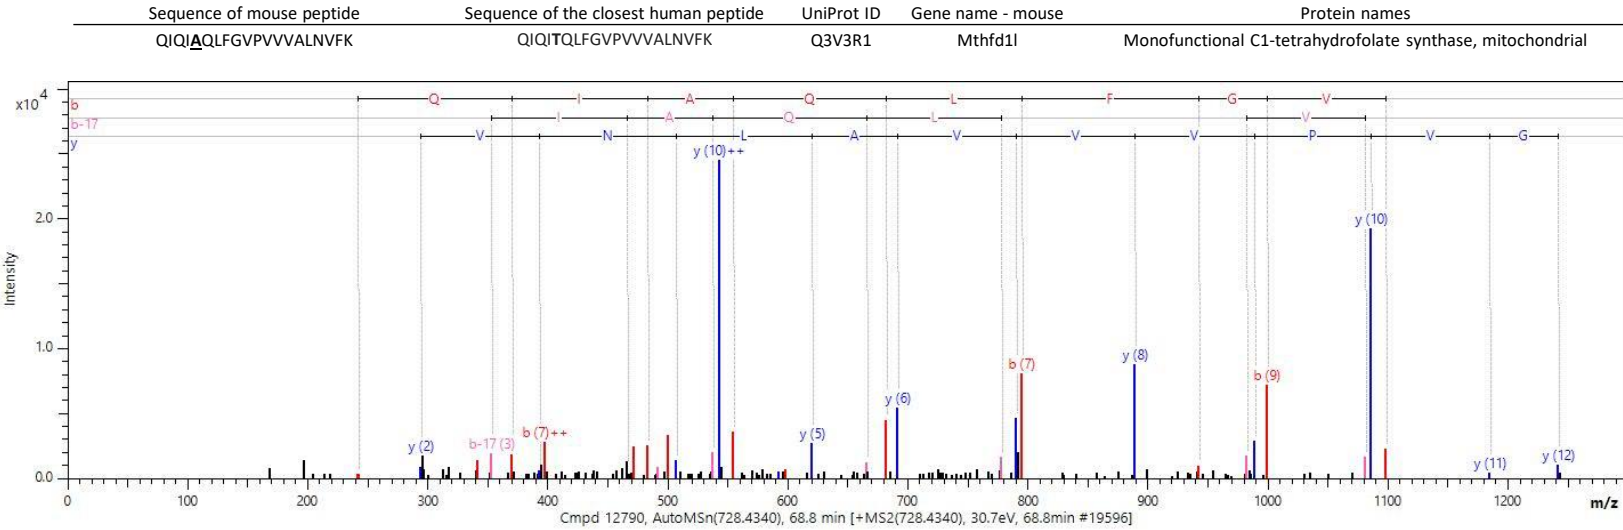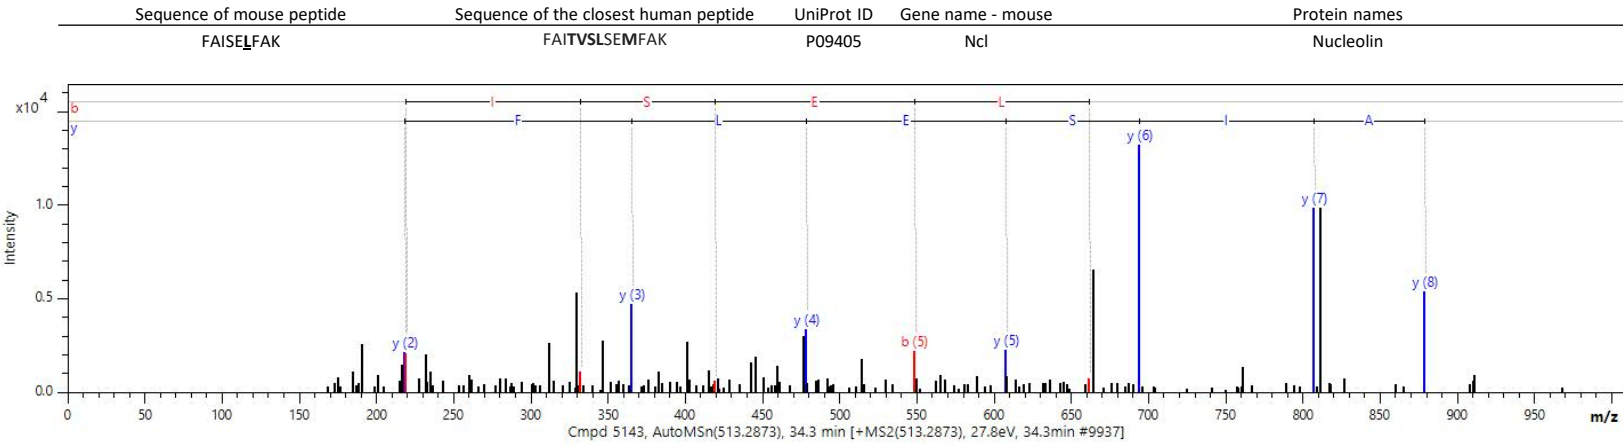

MS/MS spectra of selected mouse peptides detected in the suspension of co-cultured CCRF-CEM cells

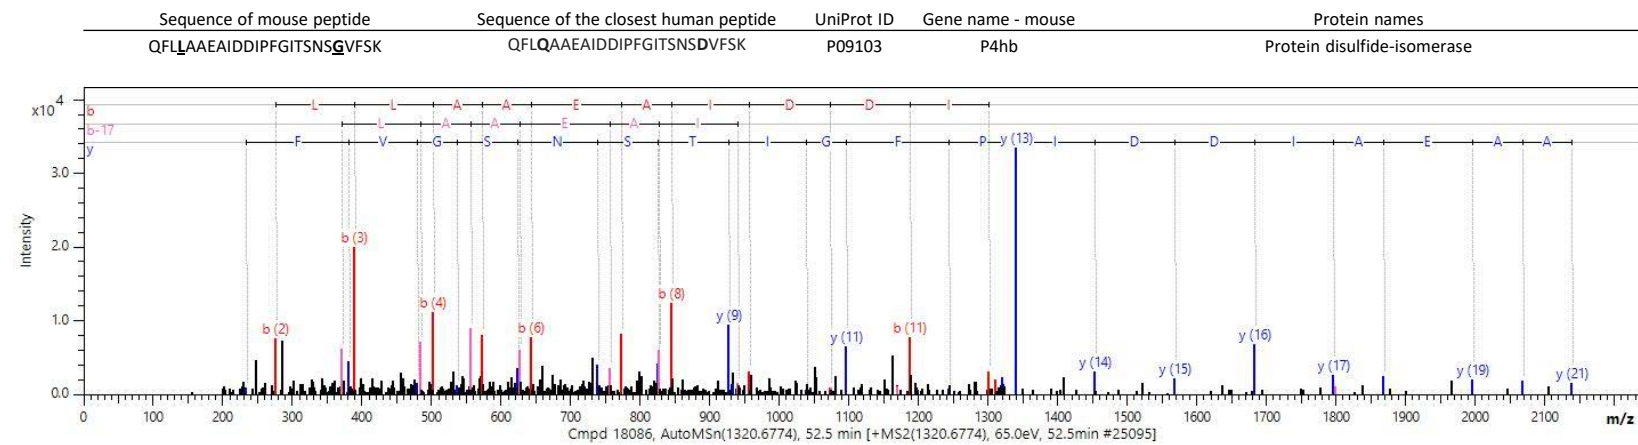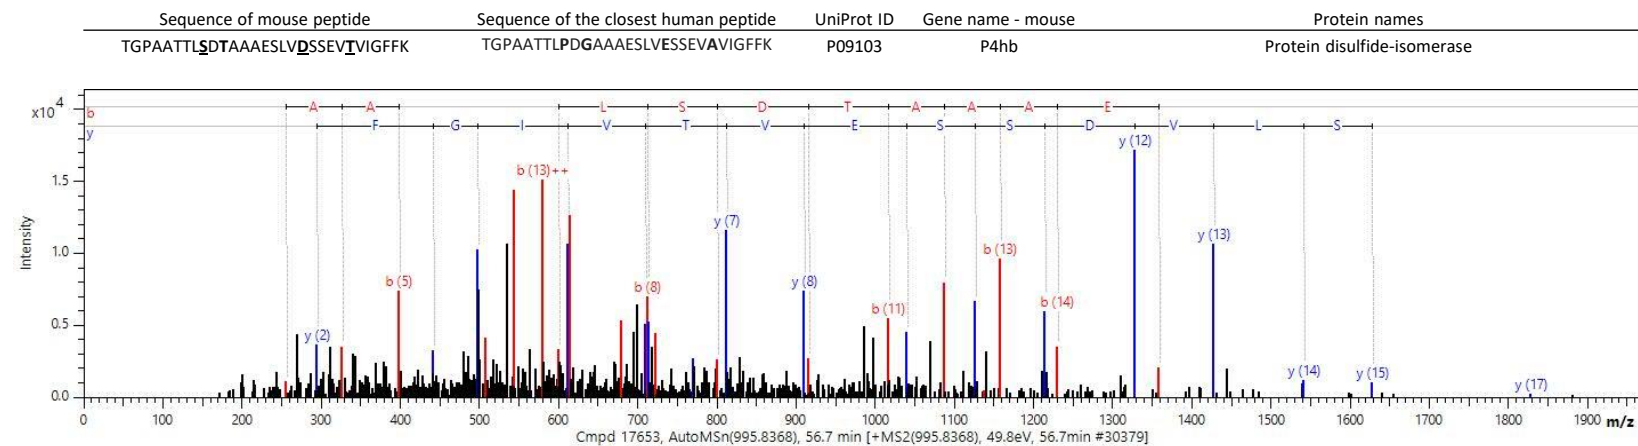

MS/MS spectra of selected mouse peptides detected in the suspension of co-cultured CCRF-CEM cells

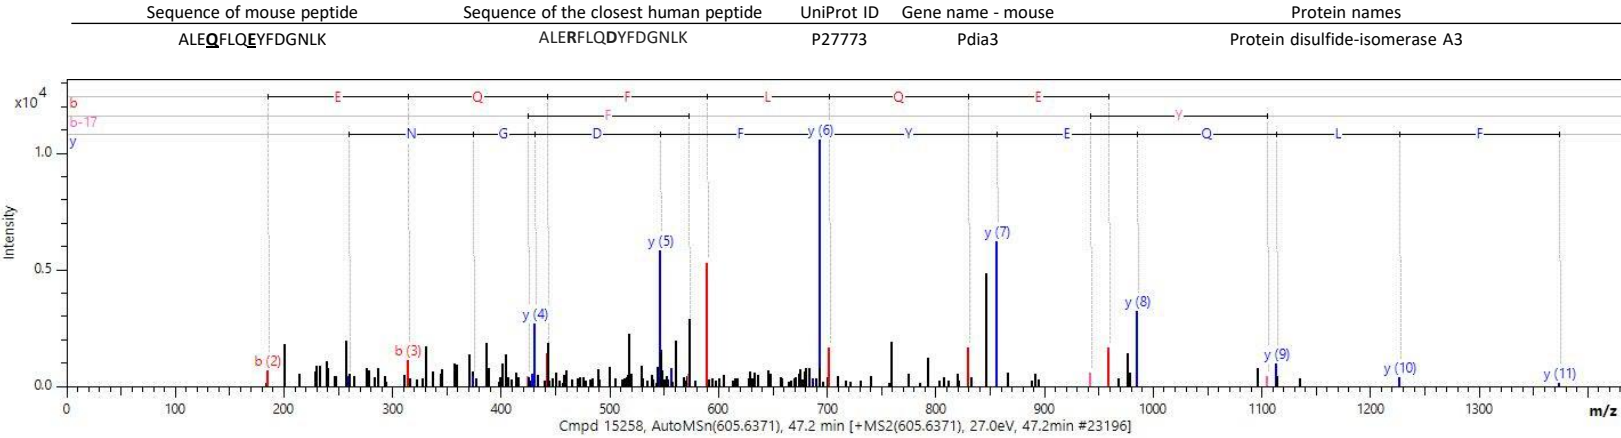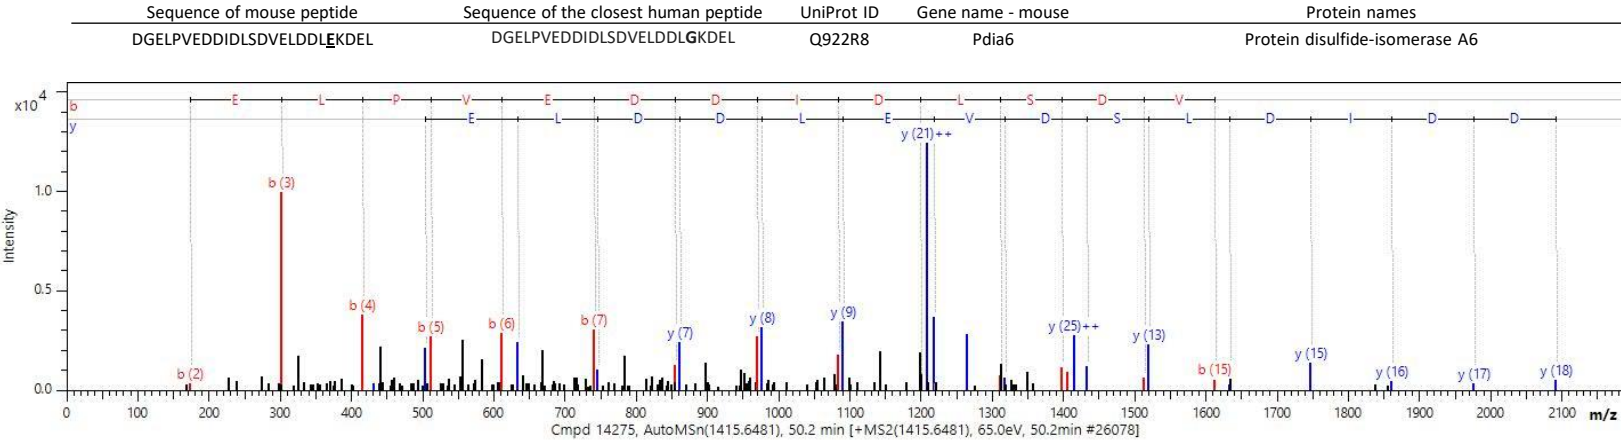

MS/MS spectra of selected mouse peptides detected in the suspension of co-cultued CCRF-CEM cells

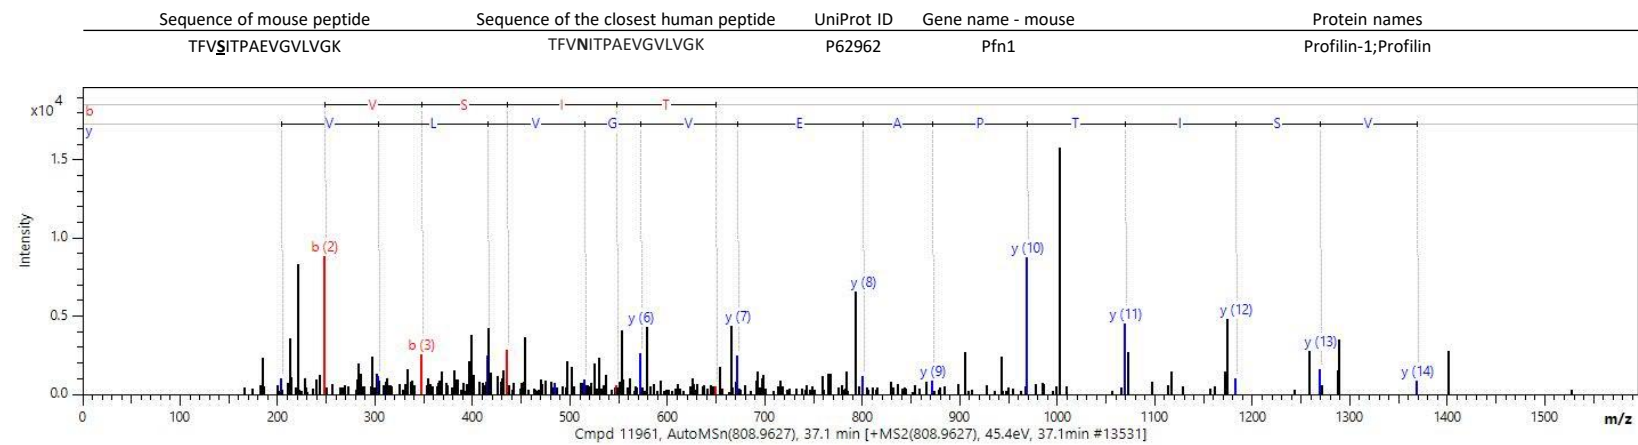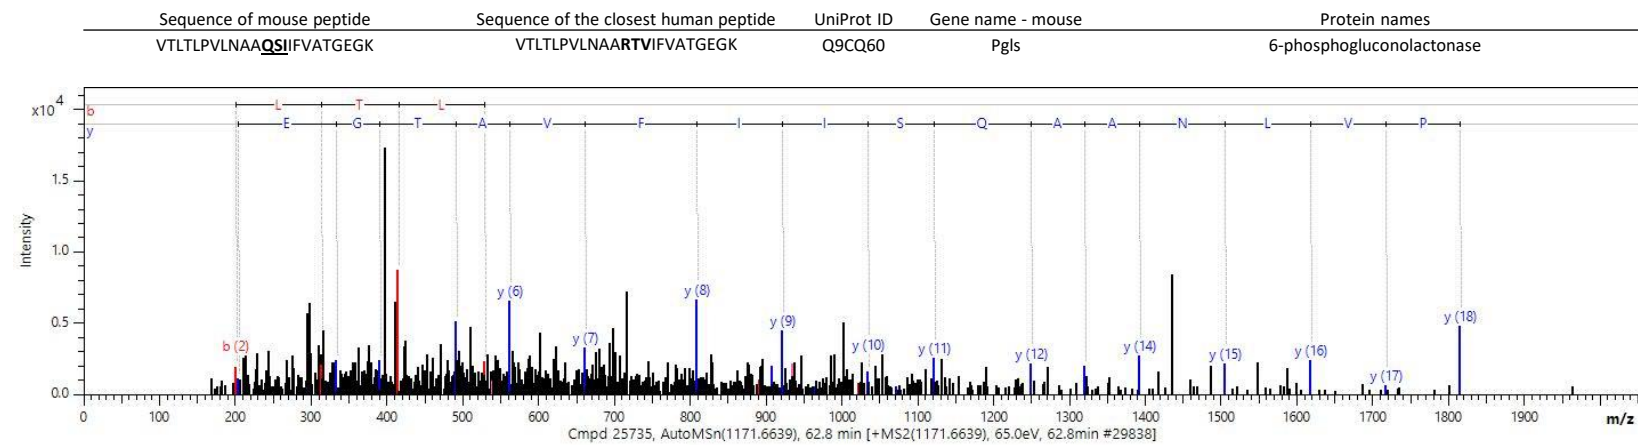

MS/MS spectra of selected mouse peptides detected in the suspension of co-cultued CCRF-CEM cells

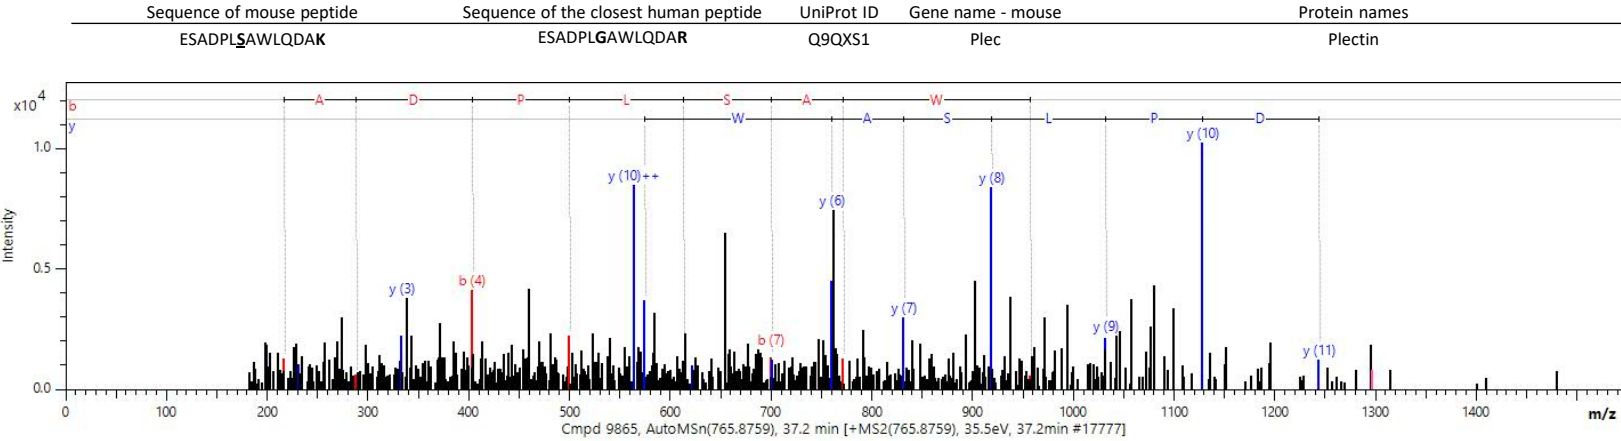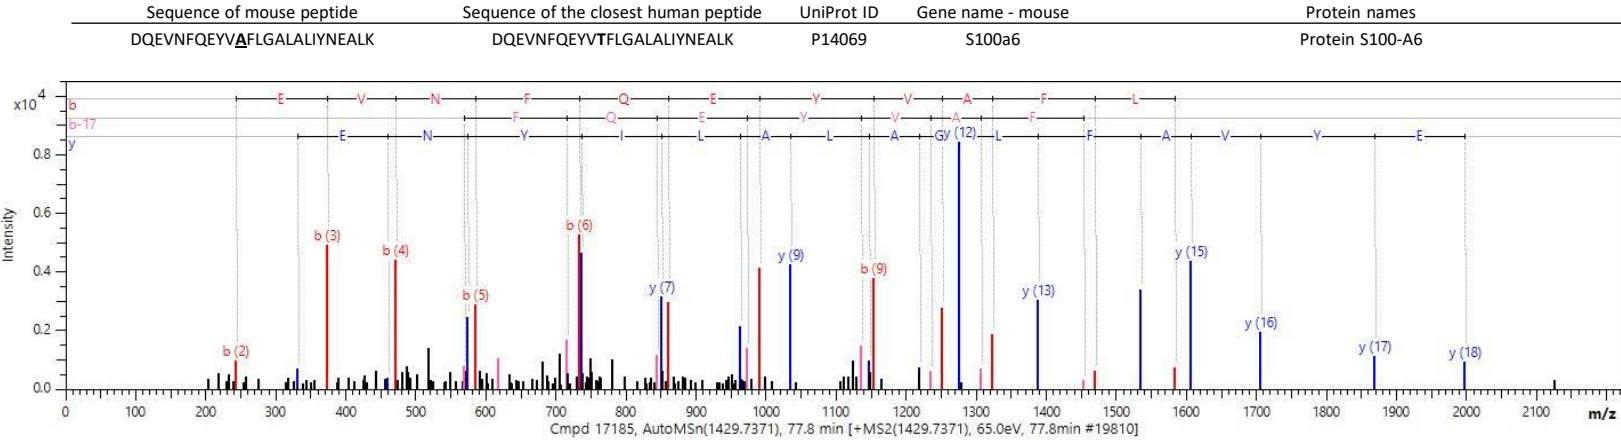

MS/MS spectra of selected mouse peptides detected in the suspension of co-cultued CCRF-CEM cells

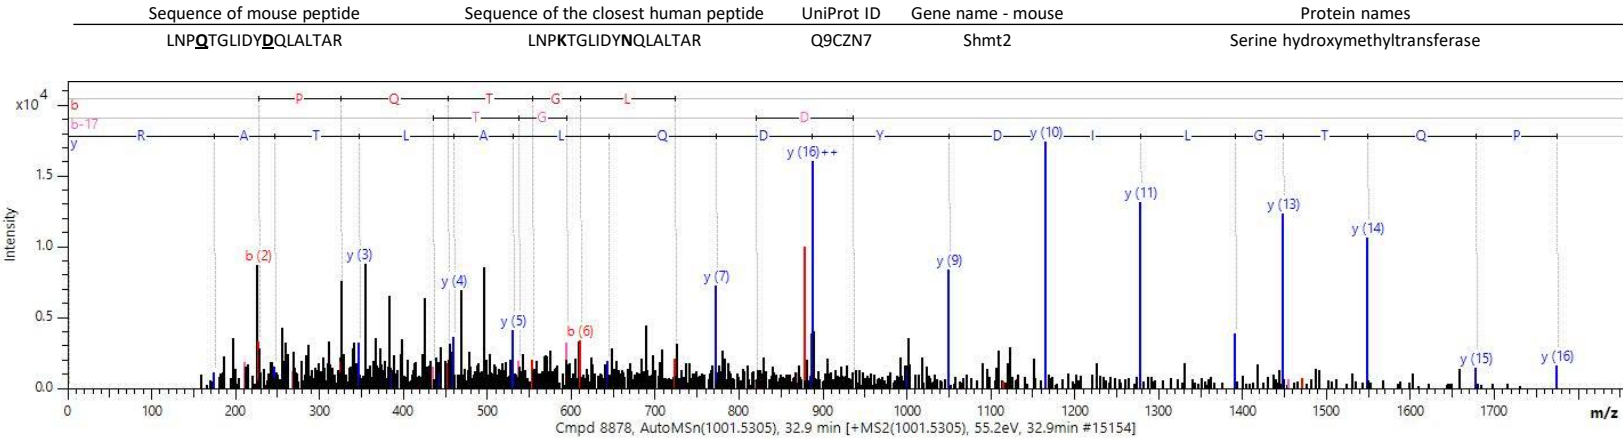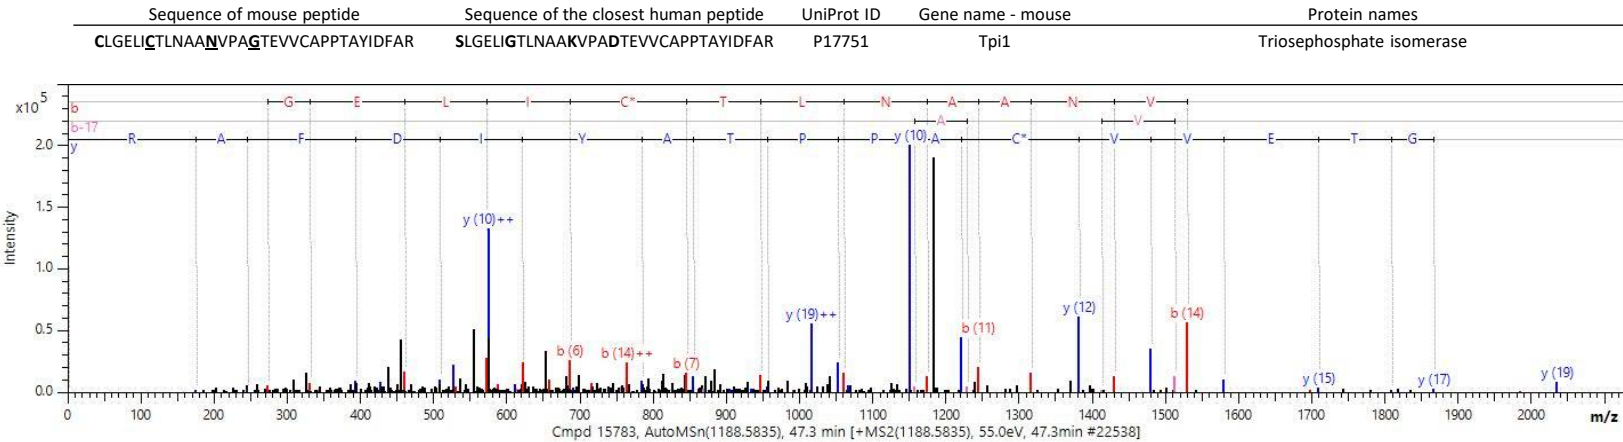

MS/MS spectra of selected mouse peptides detected in the suspension of co-cultured CCRF-CEM cells

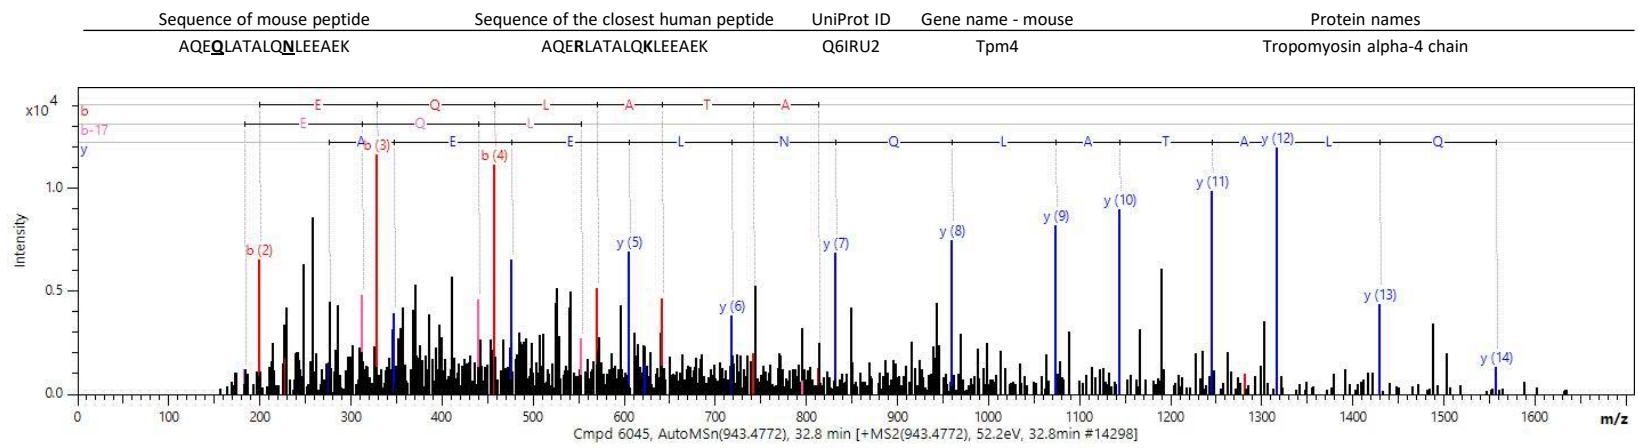

Supplement: Supplementary file 1 [file proteomes-11-00015-s001.zip › Supplementary Figure S1.pdf]
