# Supplementary material for: Shotgun Proteomics of Co-Cultured Leukemic and Bone Marrow Stromal Cells from Different Species as a Preliminary Approach to Detect Intercellular Protein Transfer
Source: Proteomes. 2023 Apr 5;11(2):15. doi: 10.3390/proteomes11020015 (PMC10123657; doi:10.3390/proteomes11020015)
Supplement: Supplementary file 1 [file proteomes-11-00015-s001.zip › Suplementary Table S1.xlsx]

## Sheet: MousepeptidesinCCRFCEM
Sequence of mouse peptides. Residues in bold letters are different between the closest mouse and human peptides. The y or b ions corresponding to the underlied residues were detected in the CID fragmentation spectrum.	Sequence of the closest human peptide	UniProt ID Proteins	UniProt ID Leading razor protein	Gene names - mouse	Protein names	Unique (Proteins)	LFQ intensity Co-culture CCRF-CEM A	LFQ intensity Co-culture CCRF-CEM B	LFQ intensity Co-culture CCRF-CEM C	LFQ intensity Monoculture CCRF-CEM A	LFQ intensity Monoculture CCRF-CEM B	LFQ intensity Monoculture CCRF-CEM C	LFQ intensity Co-culture OP9 A	LFQ intensity Co-culture OP9 B	LFQ intensity Co-culture OP9 C	LFQ intensity Monoculture OP9 A	LFQ intensity Monoculture OP9 B	LFQ intensity Monoculture OP9 C
FASEITPITISVK	FAGDIT--TISVK	Q8QZT1	Q8QZT1	Acat1	Acetyl-CoA acetyltransferase, mitochondrial	yes	0	275110	293270	0	0	0	2826200	1331400	3263300	2872600	2640600	2451000
IAAFADAAVDPIDFPLAPAYAVPK	IVAFADAAVEPIDFPIAPVYAASM	Q8QZT1	Q8QZT1	Acat1	Acetyl-CoA acetyltransferase, mitochondrial	yes	105500	914460	124060	0	0	0	5674900	4086500	3924300	1881600	1234600	1874100
TPIGSFLGSLASQPATK	TPIGSFLGSLSLLPATK	Q8QZT1	Q8QZT1	Acat1	Acetyl-CoA acetyltransferase, mitochondrial	yes	170780	270850	375830	0	0	0	5660300	6960900	4011300	3732600	3085900	1886700
GELVPLDTVLDMLR	GQLVPLETVLDMLR	Q9R0Y5;Z4YN97;A0A0A6YXW8	Q9R0Y5	Ak1	Adenylate kinase isoenzyme 1	no	206100	403900	0	0	0	0	4864900	9896600	4388700	484130	1995600	4587000
VNAEGTVDTVFSEVCTYLDSLK	VNAEGSVDSVFSQVCTHLDALK	Q9R0Y5	Q9R0Y5	Ak1	Adenylate kinase isoenzyme 1	yes	100980	604220	232020	0	0	0	6560200	684180	1166300	1456500	4783500	2497000
LDYLDLYLIHWPQGLQPGK	LDYLDLYLIHWPTGFRPGK	P45377	P45377	Akr1b8	Aldose reductase-related protein 2	yes	0	190060	159460	0	0	0	2566300	2436100	2034900	2030600	2040000	1519000
TTFLEAWEGMEELVDQGLVK	GTFLDAWEAMEELVDEGLVK	P45377	P45377	Akr1b8	Aldose reductase-related protein 2	yes	387680	73178	203410	0	0	0	2284500	1711700	3731600	725920	944270	1850100
ANYLSQALQAGTVWINCYDVFGAQSPFGGYK	ANYLSQALQAGTVWVNCYDVFGAQSPFGGYK	P47738;A0A0G2JFQ0;A0A0G2JF60	P47738	Aldh2	Aldehyde dehydrogenase, mitochondrial	no	84467	265630	0	0	0	0	410440	1688900	379320	6726100	3800100	98187
TFPTVNPSTGEVICQVAEGNK	TFPTVNPSTGEVICQVAEGDK	A0A0G2JEU1;D3YYF3;P47738	P47738	Aldh2	Aldehyde dehydrogenase, mitochondrial	no	298840	1327600	0	0	0	0	9355200	187260	290700	2191100	6101400	3510100
VAFTGSTEVGHLIQVAAGSSNLK	VAFTGSTEIGRVIQVAAGSSNLK	A0A0G2JEU1;P47738	P47738	Aldh2	Aldehyde dehydrogenase, mitochondrial	no	1430200	2632500	0	0	0	0	24937000	3572000	10410000	8484400	10479000	10429000
ALTGHLEEVVLAMLK	ALTGHLEEVVLALLK	P10107;A0A494BBD8	P10107	Anxa1	Annexin A1	no	2678100	2413500	1388400	0	0	0	15673000	37947000	14747000	5765200	16140000	7247000
CQDLSVNQDLADTDAR	SEDFGVNEDLADSDAR	P10107;A0A494BBD8	P10107	Anxa1	Annexin A1	no	0	338840	0	0	0	0	0	1197900	0	2828700	0	0
FLENQEQEYVQAVK	FIENEEQEYVQTVK	P10107;A0A494BBD8	P10107	Anxa1	Annexin A1	no	0	382030	373780	0	0	0	5459900	7371600	12240000	4897000	2690800	9980800
GGPGSAVSPYPSFNVSSDVAALHK	GGPGSAVSPYPTFNPSSDVAALHK	P10107;A0A494BBD8	P10107	Anxa1	Annexin A1	no	467060	2832100	2889800	0	0	0	19689000	1568900	38981000	19074000	8338100	26063000
GLGTDEDTLIEILTTR	GLGTDEDTLIEILASR	P10107;A0A494BBD8	P10107	Anxa1	Annexin A1	no	4187800	5163800	3853000	0	0	0	24267000	122570000	39268000	28504000	25465000	50119000
GTDVNVFTTILTSR	GTDVNVFNTILTTR	P10107;A0A494BBD8	P10107	Anxa1	Annexin A1	no	3599700	4548700	2806500	0	0	0	40585000	45959000	23359000	15597000	27698000	19706000
FLSILCSR	FLTVLCSR	P97429;A0A0N4SW89;A0A0N4SV57;D3Z0S1;F7ANV6	P97429	Anxa4	Annexin A4;Annexin	no	87062	0	497500	0	0	0	6850500	620450	3871600	6232300	1095700	1466300
GLGTDEDAIIGILAYR	GLGTDEDAIISVLAYR	P97429;A0A0N4SW89;A0A0N4SV57;S4R1F2;D3Z0S1;F7ANV6	P97429	Anxa4	Annexin A4;Annexin	no	0	68011	0	0	0	0	4369800	7710700	5567900	2202900	4761900	8967800
SELSSNFEQVILGLMTPTVLYDVQELR	SELSGNFEQVIVGMMTPTVLYDVQELR	P97429;A0A0N4SW89;A0A0N4SV57;S4R1F2	P97429	Anxa4	Annexin A4;Annexin	no	190680	377570	108680	0	0	0	3171700	1001000	1779500	3841000	1559000	1584100
VLVSLSAAGR	VLVSLSAGGR	P97429;A0A0N4SW89;A0A0N4SV57;S4R1F2;D3Z0S1	P97429	Anxa4	Annexin A4;Annexin	no	0	216880	141940	0	0	0	3452200	316610	2608000	4021000	2550500	2401200
GLGTDEDSILNLLTSR	GLGTDEESILTLLTSR	P48036;A0A0G2JGQ0	P48036	Anxa5	Annexin A5	no	6818000	11909000	6282100	0	0	0	21231000	99460000	67414000	12762000	15695000	72513000
GTVTDFPGFDGR	GTVTDFPGFDER	P48036;A0A0G2JGQ0	P48036	Anxa5	Annexin A5	no	554930	230130	1068300	0	0	0	4514600	1376300	16056000	9458900	606780	10611000
ESILELITSR	EAILDIITSR	P14824;F8WIT2	P14824	Anxa6	Annexin A6;Annexin	no	239330	65020	0	0	0	0	3186600	2104700	1682000	1131000	3081900	3747500
GIGTDEATIIDIVTHR	GLGTDEDTIIDIITHR	P14824;F8WIT2	P14824	Anxa6	Annexin A6;Annexin	no	74858	0	0	0	0	0	2696600	3990300	4381500	1538000	2051500	2709200
LTLVCSTAPGPLELDLTGDLESFK	LTLVCSSAPGPLELDLTGDLESFK	Q99PT1	Q99PT1	Arhgdia	Rho GDP-dissociation inhibitor 1	yes	0	256250	0	0	0	0	8674600	2531000	4189000	4798000	2485000	2941700
LTLVCSTAPGPLELDLTGDLESFKK	LTLVCSSAPGPLELDLTGDLESFK	Q99PT1	Q99PT1	Arhgdia	Rho GDP-dissociation inhibitor 1	yes	685240	0	0	0	0	0	5449800	7303400	13693000	5167400	3166900	10500000
VAVSADPNVPNVIVTR	VAVSADPNVPNVVVTG	Q99PT1	Q99PT1	Arhgdia	Rho GDP-dissociation inhibitor 1	yes	0	905020	695670	0	0	0	7868100	5856200	5606300	5956100	7637600	6104300
ILVNSITSLVNTFVPSGK	VIVNSLKNMINTFVPSGK	Q9WV54;D3Z505	Q9WV54	Asah1	Acid ceramidase;Acid ceramidase subunit alpha;Acid ceramidase subunit beta	no	503210	1143400	0	0	0	0	1292200	1183500	1107400	1498700	1001700	3323400
IMAPVYFILGGK	ILAPAYFILGGN	Q9WV54	Q9WV54	Asah1	Acid ceramidase;Acid ceramidase subunit alpha;Acid ceramidase subunit beta	yes	108670	0	0	0	0	0	573170	240930	0	344120	354040	1096800
LPGMIGSLPDPFGEEMR	LPGLLGNFPGPFEEEMK	Q9WV54	Q9WV54	Asah1	Acid ceramidase;Acid ceramidase subunit alpha;Acid ceramidase subunit beta	yes	0	197900	0	0	0	0	250510	555630	336210	856220	702070	939680
LTVFTTLMDVTK	LTVYTTLIDVTK	Q9WV54	Q9WV54	Asah1	Acid ceramidase;Acid ceramidase subunit alpha;Acid ceramidase subunit beta	yes	0	317750	0	0	0	0	447030	757370	349500	831540	563460	624620
NLSFATIYDVLSTKPVLNK	NISFETMYDVLSTKPVLNK	Q9WV54	Q9WV54	Asah1	Acid ceramidase;Acid ceramidase subunit alpha;Acid ceramidase subunit beta	yes	248600	304230	0	0	0	0	411850	259000	540640	432190	567550	1012100
LPITVLNGAPGFINLCDALNAWQLVTELR	LPITVLNGAPGFINLCDALNAWQLVKELK	Q9CWJ9	Q9CWJ9	Atic	Bifunctional purine biosynthesis protein PURH;Phosphoribosylaminoimidazolecarboxamide formyltransferase;IMP cyclohydrolase	yes	0	321700	0	0	0	0	175440	0	120980	0	208120	1004900
LSGVSVSSDAFFPFR	LTEVSISSDAFFPFR	Q9CWJ9	Q9CWJ9	Atic	Bifunctional purine biosynthesis protein PURH;Phosphoribosylaminoimidazolecarboxamide formyltransferase;IMP cyclohydrolase	yes	0	609500	169920	0	0	0	1107400	4727600	417870	2543700	2061000	2211100
SLASLGLSLVASGGTAK	NLTALGLNLVASGGTAK	Q9CWJ9	Q9CWJ9	Atic	Bifunctional purine biosynthesis protein PURH;Phosphoribosylaminoimidazolecarboxamide formyltransferase;IMP cyclohydrolase	yes	0	193430	0	0	0	0	3192200	4671800	3447700	1321200	1850700	2499400
TVASPDVTVEAAVEQIDIGGVTLLR	TVASPGVTVEEAVEQIDIGGVTLLR	Q9CWJ9	Q9CWJ9	Atic	Bifunctional purine biosynthesis protein PURH;Phosphoribosylaminoimidazolecarboxamide formyltransferase;IMP cyclohydrolase	yes	0	738860	173200	216550	0	0	0	0	146930	0	0	0
LASLSEKPPAIDWAYYR	LAALPENPPAIDWAYYK	Q9DCX2;B1ASE2	Q9DCX2	Atp5h	ATP synthase subunit d, mitochondrial	no	290060	719020	0	0	0	0	5680000	7554700	6587900	3609500	4991800	4532000
NIIPFDQMTIDDLNEIFPETK	NLIPFDQMTIEDLNEAFPETK	Q9DCX2	Q9DCX2	Atp5h	ATP synthase subunit d, mitochondrial	yes	138650	653360	131850	0	0	0	4133500	14745000	8421000	2851600	1726200	7209900
FSPLTANLMNLLAENGR	FSPLTTNLINLLAENGR	Q9DB20;F7D3P8	Q9DB20	Atp5o	ATP synthase subunit O, mitochondrial	no	224100	402300	0	0	0	0	1733900	3005700	1410200	928450	1807300	2643500
GEVPCTVTTASPLDDAVLSELK	GEVPCTVTSASPLEEATLSELK	Q9DB20;A0A338P7G3	Q9DB20	Atp5o	ATP synthase subunit O, mitochondrial	no	0	670620	0	0	0	0	2985600	2091100	4604200	0	322050	2299900
LGNTQGIISAFSTIMSVHR	LSNTQGVVSAFSTMMSVHR	Q9DB20;A0A338P7G3;F7D3P8	Q9DB20	Atp5o	ATP synthase subunit O, mitochondrial	no	144730	325410	0	0	0	0	3494900	4194000	1688000	852560	565220	2911100
VSLAVLNPYIK	FPLAVLKPYIH	Q9DB20;A0A338P776;F7D3P8	Q9DB20	Atp5o	ATP synthase subunit O, mitochondrial	no	333830	779800	211210	0	0	0	5355300	8235500	4387600	4317200	4894300	3557700
ALGGIGPVDLLVNNAALVIMQPFLEVTK	ALGSVGPVDLLVNNAAVALLQPFLEVTK	P08074	P08074	Cbr2	Carbonyl reductase [NADPH] 2	yes	635530	1220800	527560	0	0	0	10510000	1435600	3973300	9417700	3100500	3260600
FAEVEDVVNSILFLLSDR	FAEVEHVVNAILFLLSDR	P08074;F6YNX9	P08074	Cbr2	Carbonyl reductase [NADPH] 2	no	500660	226230	178850	0	0	0	4666400	4189200	5228500	3218000	1545600	5097700
SVFQVSQMVAR	AVIQVSQIVAR	P08074	P08074	Cbr2	Carbonyl reductase [NADPH] 2	yes	456450	1907200	1406400	0	0	0	14415000	4150400	12162000	11306000	6035300	11570000
VNSVNPTVVLTDMGK	VNAVNPTVVMTSMGQ	P08074;F6YNX9	P08074	Cbr2	Carbonyl reductase [NADPH] 2	no	0	293970	671560	0	0	0	5927300	3748900	10434000	1068600	5069200	4265400
EDLVFIFWAPENAPLK	EDLVFIFWAPESAPLK	P18760;F8WGL3;A0A494B9A7	P18760	Cfl1	Cofilin-1	no	712310	365960	494300	0	0	0	7634500	3462700	1060400	4190200	5201600	5986200
EILVGDVGQTVDDPYTTFVK	EILVGDVGQTVDDPYATFVK	P18760;F8WGL3;A0A494B9A7	P18760	Cfl1	Cofilin-1	no	1552500	2985100	1141300	0	0	0	12727000	12725000	16854000	10277000	2809500	10505000
KEDLVFIFWAPENAPLK	KEDLVFIFWAPESAPLK	P18760;F8WGL3;A0A494B9A7	P18760	Cfl1	Cofilin-1	no	276060	0	95433	0	0	0	4651500	25006000	19699000	3391300	5302500	10454000
SLPSLPQQLIQPLTTYVSGGVQEVPLSQPESK	SSLPALPQQLIQPlTTYVSGGVEEVPLAQPESK	E9PWQ3;D3YWD1	E9PWQ3	Col6a3	Collagen, type VI, alpha 3	no	0	646300	434840	0	0	0	2481100	4457700	3210300	3930700	3343700	2573600
VGSVQELSELSETVLETLHDAMHETLCPGVTDVSK	VGNVQELSELSEQVLETLHDAMHETLCPGVTDAAK	E9PWQ3;J3QQ16;A0A087WS16	E9PWQ3	Col6a3	Collagen, type VI, alpha 3	no	218930	997260	160160	0	0	0	2031800	1886500	439320	0	0	0
APDAWDYSQGFVNEEMIR	APEAWDYGQGFVNEEMIR	Q9DCN2	Q9DCN2	Cyb5r3	NADH-cytochrome b5 reductase 3;NADH-cytochrome b5 reductase 3 membrane-bound form;NADH-cytochrome b5 reductase 3 soluble form	yes	0	591720	0	0	0	0	2204100	4635600	5595100	2923500	1662000	2803800
DHLPTPGEEPLILMCGPPPMIQFACLPNLER	DHLPPPEEEPLVLMCGPPPMIQYACLPNLDH	Q9DCN2	Q9DCN2	Cyb5r3	NADH-cytochrome b5 reductase 3;NADH-cytochrome b5 reductase 3 membrane-bound form;NADH-cytochrome b5 reductase 3 soluble form	yes	632480	1779300	365600	0	0	0	8955800	22600000	14979000	7245700	5549800	6492100
FALPSPQHILGLPIGQHIYLSTR	FALPSPQHILGLPVGQHIYLSAR	Q9DCN2;F2Z456	Q9DCN2	Cyb5r3	NADH-cytochrome b5 reductase 3;NADH-cytochrome b5 reductase 3 membrane-bound form;NADH-cytochrome b5 reductase 3 soluble form;NADH-cytochrome b5 reductase	no	537840	1642900	347550	0	0	0	11947000	23197000	10700000	4044000	4857800	6969000
LWYTVDKAPDAWDYSQGFVNEEMIR	LWYTLDRAPEAWDYGQGFVNEEMIR	Q9DCN2	Q9DCN2	Cyb5r3	NADH-cytochrome b5 reductase 3;NADH-cytochrome b5 reductase 3 membrane-bound form;NADH-cytochrome b5 reductase 3 soluble form	yes	87699	0	0	0	0	0	308080	3491500	1970200	0	862700	513780
EELMFFLWAPEQAPLK	EELMFFLWAPELAPLK	Q9R0P5	Q9R0P5	Dstn	Destrin	yes	678820	152020	149690	0	0	0	1972200	413360	0	663180	1553100	1769500
EILVGDVGATITDPFK	EILVGDVGVTITDPFK	Q9R0P5	Q9R0P5	Dstn	Destrin	yes	243560	1782300	150990	0	0	0	9403300	5618400	4047200	1937600	2173800	8466000
VFDAIMNFR	VFDAIMNFK	P58252	P58252	Eef2	Elongation factor 2	yes	0	1610900	206040	0	0	0	12276000	11533000	8016800	9298400	6700800	5901100
VFSGVVSTGLK	VFSGLVSTGLK	P58252	P58252	Eef2	Elongation factor 2	yes	0	1040100	375210	0	0	0	13587000	463360	8879000	11621000	5764700	3612200
ESGYLHIQATKPDTVGCALNDSPVGLAAYILEK	ESGYMHIQCTKPDTVGSALNDSPVGLAAYILEK	Q9D379;E9PWK1;F6YTS6	Q9D379	Ephx1	Epoxide hydrolase 1	no	0	288230	0	0	0	0	4405100	4006700	5623500	851720	2163600	5579600
KFSLEDLLTNIMIYWTTGTIVSSQR	KFSLDDLLTNVMLYWTTGTIISSQR	Q9D379;E9PWK1	Q9D379	Ephx1	Epoxide hydrolase 1	no	83431	0	0	0	0	0	289770	711250	1304200	677700	290840	893920
NIYSLTPLLGQR	HIYSLMPLLLEA	Q9D379;E9PWK1;F6YTS6	Q9D379	Ephx1	Epoxide hydrolase 1	no	0	841690	0	0	0	0	4559200	3514500	1476700	2464200	1932300	2118000
QVEILNQYPHFK	QVEILNRYPHFK	Q9D379;E9PWK1;D3Z4M3	Q9D379	Ephx1	Epoxide hydrolase 1	no	164440	262410	0	0	0	0	812150	247100	633610	769910	2474400	1606100
VFVPTGYSAFPSEILHAPEK	VYVPTGFSAFPFELLHTPEK	Q9D379;E9PWK1	Q9D379	Ephx1	Epoxide hydrolase 1	no	257360	433850	0	0	0	0	5985300	5255800	6407100	5371400	4622100	6562800
ENTFYNWLEGLCVEK	ENTFYSWLEGLCVEK	A0A2I3BPM1;Q8R180	Q8R180	Ero1l	ERO1-like protein alpha	no	174040	851130	0	0	0	0	4077900	2856500	561140	2770900	7637100	6977500
IWSVIYEENCFKPQTIQRPLASGR	IWNVIYEENCFKPQTIKRPLNPLASGQ	Q8R180	Q8R180	Ero1l	ERO1-like protein alpha	yes	0	303270	427580	0	0	0	7487700	5208200	5982100	6316800	3925600	8747900
LIANMPESGPSYEFQLTR	LIANMPESGPSYEFHLTR	A0A2I3BPM1;Q8R180	Q8R180	Ero1l	ERO1-like protein alpha	no	0	169060	0	0	0	0	3219600	1838500	1434100	977890	2011100	5295900
DDEFLSNGQLLPDNFIAACTEK	DDQFLLDGQLLPDNFIAACTEK	H3BKH6;Q9R0P3;H3BJP2;H3BLJ9;H3BJL6;H3BK43	H3BKH6	Esd	S-formylglutathione hydrolase	no	0	907950	150580	0	0	0	6384900	396440	711930	3892400	3147700	6930600
SVSAFAPICNPVLCSWGK	SVSAFAPICNPVLCPWGK	H3BKH6;Q9R0P3;H3BJP2;H3BLJ9;H3BJL6	H3BKH6	Esd	S-formylglutathione hydrolase	no	352330	1081500	0	0	0	0	6430200	4028800	8458300	5340400	7721600	6613100
LGSAADFLLDISETDLSTLTASIK	LGSAADFLLDISETDLSSLTASIK	Q80X90	Q80X90	Flnb	Filamin-B	yes	0	207420	0	0	0	0	1604300	1905800	1483600	1264500	1519700	782080
VTASGPGLSAYGVPASLPVEFAIDAR	VTASGPGLSSYGVPASLPVDFAIDAR	Q80X90	Q80X90	Flnb	Filamin-B	yes	0	398590	95549	0	0	0	4356600	4814300	3726500	4404700	2293100	2719100
EINLSPDSSSVIVSGLMVATK	EINLAPDSSSVVVSGLMVATK	A0A087WR50;Q3UHL6;P11276;A0A087WS56;A0A087WSU6;A0A087WSN6;B9EHT6;B7ZNJ1	A0A087WR50	Fn1	Fibronectin;Anastellin	no	91305	0	0	0	0	0	2011500	2286300	2375600	765230	2770900	1839400
FLTTTPNSLLVSWQAPR	FLATTPNSLLVSWQPPR	A0A087WR50;Q3UHL6;P11276;A0A087WS56;A0A087WSN6;B9EHT6;B7ZNJ1	A0A087WR50	Fn1	Fibronectin;Anastellin	no	152710	121780	0	0	0	0	4613800	7706300	5214800	6265800	9438500	11593000
FSQVTPTSFTAQWIAPSVQLTGYR	FTQVTPTSLSAQWTPPNVQLTGYR	A0A087WR50;Q3UHL6;P11276;A0A087WS56;A0A087WSN6;B9EHT6;B7ZNJ1	A0A087WR50	Fn1	Fibronectin;Anastellin	no	677720	116040	32241	0	0	0	11462000	7721200	5926400	6024500	6857200	15847000
GVTYNIIVEALQNQR	GATYNIIVEALKDQ	A0A087WR50;Q3UHL6;P11276;A0A087WS56;A0A087WSN6;B9EHT6;B7ZNJ1	A0A087WR50	Fn1	Fibronectin;Anastellin	no	401800	0	0	0	0	0	3554700	6791200	3502000	4099300	5869400	4843000
NTFAEITGLSPGVTYLFK	NTFAEVTGLSPGVTYYFK	A0A087WR50;Q3UHL6;P11276;A0A087WS56;A0A087WSN6;B9EHT6;B7ZNJ1	A0A087WR50	Fn1	Fibronectin;Anastellin	no	334890	284860	0	0	0	0	4415900	10418000	5544300	10446000	10324000	18802000
TVLVTWTPPR	TVLVRWTPPR	A0A087WR50;Q3UHL6;P11276;A0A087WS56;A0A087WSN6;B9EHT6;B7ZNJ1	A0A087WR50	Fn1	Fibronectin;Anastellin	no	0	556750	0	0	0	0	6442600	3182600	5729200	9659700	7913900	9225600
YSFCTDHAVLVQTR	YSFCTDHTVLVQTR	A0A087WR50;Q3UHL6;P11276;A0A087WS56;A0A087WSN6;B9EHT6;B7ZNJ1	A0A087WR50	Fn1	Fibronectin;Anastellin	no	470550	215980	250970	0	0	0	4970400	2376500	1826600	12427000	4450200	4727500
NPCGLIQYIPVLVDAFLPLLK	NPSGLTQYIPVLVDSFLPLLK	E9PVA8	E9PVA8	Gcn1l1	eIF-2-alpha kinase activator GCN1	yes	0	44371	0	0	0	0	447670	341780	346210	280040	0	120250
VLPQLISTITASVQNPALCLVTR	VLPQLISTITASVQNPALRLVTR	E9PVA8	E9PVA8	Gcn1l1	eIF-2-alpha kinase activator GCN1	yes	193590	1223000	0	0	0	0	2616700	2258700	1325800	2038000	1982200	2095900
FDLGQDVIDFTGHSLALYR	FDLGQDVIDFTGHALALYR	Q61598;A0A1Y7VL99	Q61598	Gdi2	Rab GDP dissociation inhibitor beta	no	674440	390720	318510	0	0	0	493060	4780800	844500	781290	2001800	2509400
FVSISDLFVPK	FVSISDLLVPK	Q61598;A0A1Y7VLG4	Q61598	Gdi2	Rab GDP dissociation inhibitor beta	no	288090	802910	0	0	0	0	5008800	9065200	3088200	2254200	6863100	5864100
ILIRPLYSNPPLNGAR	ILIRPMYSNPPLNGAR	P05202	P05202	Got2	Aspartate aminotransferase, mitochondrial	yes	0	211360	260090	0	0	0	4296000	2470000	3344900	4097400	623690	380900
TCGFDFSGALEDISK	TCGFDFTGAVEDISK	P05202	P05202	Got2	Aspartate aminotransferase, mitochondrial	yes	0	486220	0	0	0	0	2665100	4353100	3027800	809390	2096300	3200100
EVMQMLVELAK	DVMRMLVDLAK	P06745;A0A0U1RP97;A0A0U1RQ72	P06745	Gpi	Glucose-6-phosphate isomerase	no	291900	0	0	0	0	0	2512000	5464200	7060700	0	2204900	7572100
SITDIINIGIGGSDLGPLMVTEALKPYSK	TITDVINIGIGGSDLGPLMVTEALKPYSS	P06745	P06745	Gpi	Glucose-6-phosphate isomerase	yes	201840	0	0	0	0	0	4478000	8222800	5497200	4879000	6855600	8964600
TLASLSPETSLFIIASK	TLAQLNPESSLFIIASK	P06745	P06745	Gpi	Glucose-6-phosphate isomerase	yes	769170	963410	1199300	0	0	0	15421000	10508000	9016400	4379200	9406200	17342000
VTYVDFLAYDILDQYR	LTFVDFLTYDILDQNR	F6WHQ7;P10649;A2AE89	P10649	Gstm1	Glutathione S-transferase Mu 1	no	143910	0	0	0	0	0	7520700	11740000	6435500	3593600	3545100	6352900
YIATPIFSK	DIVTPIFTK	F6WHQ7;P10649;A2AE89	P10649	Gstm1	Glutathione S-transferase Mu 1	no	0	0	688830	0	0	0	8847500	3351100	3736800	8563400	6873100	6252600
ADMVIEAVFEDLGVK	ADMVIEAVFEDLSLK	Q8BMS1	Q8BMS1	Hadha	Trifunctional enzyme subunit alpha, mitochondrial;Long-chain enoyl-CoA hydratase;Long chain 3-hydroxyacyl-CoA dehydrogenase	yes	93149	0	0	0	0	0	374750	1556000	1164500	0	157310	805150
DSIFSNLIGQLDYK	DSIFSNLTGQLDYQ	Q8BMS1	Q8BMS1	Hadha	Trifunctional enzyme subunit alpha, mitochondrial;Long-chain enoyl-CoA hydratase;Long chain 3-hydroxyacyl-CoA dehydrogenase	yes	0	191070	0	0	0	0	3716000	4833200	2085500	131840	1362300	3946800
EVQSEFIEVMNEIWANDQIR	ELHSEFSEVMNEIWASDQIR	Q8BMS1	Q8BMS1	Hadha	Trifunctional enzyme subunit alpha, mitochondrial;Long-chain enoyl-CoA hydratase;Long chain 3-hydroxyacyl-CoA dehydrogenase	yes	63594	0	0	0	0	0	344100	1711100	639040	0	0	674760
LDALTTGFGFPVGAATLADEVGVDVAQHVAEDLGK	LDSLTTSFGFPVGAATLVDEVGVDVAKHVAEDLGK	Q8BMS1	Q8BMS1	Hadha	Trifunctional enzyme subunit alpha, mitochondrial;Long-chain enoyl-CoA hydratase;Long chain 3-hydroxyacyl-CoA dehydrogenase	yes	324730	1043700	703490	0	0	0	2251900	1716600	1643500	3503000	4465700	2800300
MVGVPAAFDMMLTGR	MVGVPAVFDMMLTGR	Q8BMS1	Q8BMS1	Hadha	Trifunctional enzyme subunit alpha, mitochondrial;Long-chain enoyl-CoA hydratase;Long chain 3-hydroxyacyl-CoA dehydrogenase	yes	0	0	204980	0	0	0	3064600	4310200	2837400	1677500	1706700	2933700
TVLGVPEVLLGILPGAGGTQR	TVLGAPEVLLGILPGAGGTQR	Q8BMS1	Q8BMS1	Hadha	Trifunctional enzyme subunit alpha, mitochondrial;Long-chain enoyl-CoA hydratase;Long chain 3-hydroxyacyl-CoA dehydrogenase	yes	567950	830660	17826	0	0	0	3627300	5100800	2474200	3969800	950950	7381000
ILQSSSEVGYDAMLGDFVNMVEK	IMQSSSEVGYDAMAGDFVNMVEK	P63038	P63038	Hspd1	60 kDa heat shock protein, mitochondrial	yes	0	1445300	385980	0	0	0	3879400	12526000	10818000	1993700	2672600	3190900
ISSVQSIVPALEIANAHR	ISSIQSIVPALEIANAHR	P63038	P63038	Hspd1	60 kDa heat shock protein, mitochondrial	yes	850170	3400400	1205500	0	0	0	23730000	14226000	16796000	17003000	14640000	14930000
TALLDAAGVASLLTTAEAVVTEIPK	TALLDAAGVASLLTTAEVVVTEIPK	P63038	P63038	Hspd1	60 kDa heat shock protein, mitochondrial	yes	2088000	4881600	2398200	0	0	0	9053900	5476900	6115800	11943000	8289600	13862000
LFGMVLGSAPYTVPLPK	LFEMVLGPAAYNVPLPK	A0A0U1RP81;E9PVS5;Q8CAQ8;E9Q800;E9QAY6;A0A1B0GX08	Q8CAQ8	Immt	MICOS complex subunit Mic60	no	0	103820	0	0	0	0	1501300	1976900	587160	665230	446100	1098000
TSSVTLQTITAQNAAVQAVK	TASVTLQAIAAQNAAVQAVN	A0A0U1RP81;Q8CAQ8;E9Q800;E9QAY6;A0A1B0GX08	Q8CAQ8	Immt	MICOS complex subunit Mic60	no	55218	0	0	0	0	0	1515900	1188100	1675700	710850	727240	2360300
DLADELALVDVMEDK	DLADELALVDVIEDK	P06151;A0A1B0GSX0;D3YZQ9;A0A1B0GT41;A0A1B0GQX5;A0A1B0GSL7;A0A1B0GRW9;A0A1B0GS79;A0A1B0GRC1;A0A1B0GRS2	P06151	Ldha	L-lactate dehydrogenase A chain;L-lactate dehydrogenase	no	1971400	3103400	2729200	0	0	0	11842000	15118000	13617000	13793000	13886000	14547000
DQLIVNLLK	DQAIVNLLK	P06151;A0A1B0GSX0;A0A1B0GSR9;D3YZQ9;A0A1B0GT41;A0A1B0GQX5;A0A1B0GSL7;A0A1B0GRW9;A0A1B0GS79;A0A1B0GRC1;A0A1B0GRS2	P06151	Ldha	L-lactate dehydrogenase A chain;L-lactate dehydrogenase	no	1465400	3803300	1580000	0	0	0	11283000	21867000	17905000	13604000	17893000	29885000
FIIPNIVK	FIIPNVVK	P06151;A0A1B0GSX0;A0A1B0GSR9;D3YZQ9;A0A1B0GT41;A0A1B0GQX5;A0A1B0GSL7	P06151	Ldha	L-lactate dehydrogenase A chain;L-lactate dehydrogenase	no	1139700	1888900	782550	0	0	0	21019000	10001000	5920100	23411000	17683000	13729000
GLYGINEDVFLSVPCILGQNGISDVVK	GLYGIKDDVFLSVPCILGQNGISDLVK	P06151;A0A1B0GSX0;A0A1B0GSR9	P06151	Ldha	L-lactate dehydrogenase A chain	no	2540700	4495000	2923000	0	0	0	12658000	19588000	35644000	4572300	20133000	17573000
IQVLVEADHFK	IQVLVEPDHFK	Q8C253;P16110	Q8C253	Lgals3	Galectin;Galectin-3	no	0	271380	0	0	0	0	17183000	307310	16295000	2332400	10179000	7309500
MLITIMGTVKPNANR	MLITILGTVKPNANR	Q8C253;P16110	Q8C253	Lgals3	Galectin;Galectin-3	no	2281200	1843600	0	0	0	0	28510000	45305000	70125000	13868000	9849300	13401000
QSAFPFESGKPFK	QSVFPFESGKPFK	Q8C253;P16110	Q8C253	Lgals3	Galectin;Galectin-3	no	223540	0	0	0	0	0	32265000	4016400	26246000	15347000	18542000	27915000
LSTLPSDFCGLTHLVK	LTTLPSDFCGLTHLVK	Q922Q8	Q922Q8	Lrrc59	Leucine-rich repeat-containing protein 59	yes	560740	653690	514940	0	0	0	3615900	10694000	3465800	2685000	978450	4802400
LVNLQHLDLLNNR	LVNLQHLDLLNNK	Q922Q8	Q922Q8	Lrrc59	Leucine-rich repeat-containing protein 59	yes	202160	606470	0	0	0	0	4896000	2624100	3119600	4194900	2820100	2743800
VTGLHQQPLCTSVNTIYDNAVQGLR	VTELQQQPLCTSVNTIYDNAVQGLR	Q922Q8	Q922Q8	Lrrc59	Leucine-rich repeat-containing protein 59	yes	0	208200	0	0	0	0	3735500	1241600	2627400	1036800	2313100	1357000
DVPALEITHTFLER	DVPAVEITHTFWER	Q64133	Q64133	Maoa	Amine oxidase [flavin-containing] A	yes	0	257750	0	0	0	0	4015600	4974800	2898800	1042200	2439700	4492800
EIPVDAPWQAR	EIPTDAPWEAQ	Q64133	Q64133	Maoa	Amine oxidase [flavin-containing] A	yes	202580	107460	0	0	0	0	1913600	759920	1183300	0	1513500	2504300
YVISAIPPVLTAK	YVINAIPPTLTAK	Q64133	Q64133	Maoa	Amine oxidase [flavin-containing] A	yes	467870	542810	242770	0	0	0	8140800	6103300	5312100	6915500	6007900	4982500
SLLLTTIPQIGSMEWSETLR	SLLLTTIPQIGSTEWSETLH	Q9CQ65	Q9CQ65	Mtap	S-methyl-5-thioadenosine phosphorylase	yes	299300	650670	237470	0	0	0	9042700	4125200	4662000	4630300	1445000	4668000
TWGADVVNMTTVPEVVLAK	TWGADVINMTTVPEVVLAK	Q9CQ65	Q9CQ65	Mtap	S-methyl-5-thioadenosine phosphorylase	yes	0	176250	0	0	0	0	858790	2663500	446070	1241100	0	2233900
LNQATVTSNRPGLFYGQCSEICGSNHSFMPIVLEMVPLK	LNQTTFTATRPGVYYGQCSEICGANHSFMPIVLELIPLK	P00405	P00405	Mtco2	Cytochrome c oxidase subunit 2	yes	0	707140	0	0	0	0	5190600	4974300	2355700	1960500	3278700	4678800
MLISSEDVLHSWAVPSLGLK	MMITSQDVLHSWAVPSLGLK	P00405	P00405	Mtco2	Cytochrome c oxidase subunit 2	yes	206040	1043800	344500	0	0	0	4673100	12839000	5009800	4837200	2156600	8168900
VVLPMELPIR	VVLPIEVPIR	P00405	P00405	Mtco2	Cytochrome c oxidase subunit 2	yes	0	0	114940	0	0	0	2783000	3342400	2397500	3977300	3340500	3840500
EAGLDITHICLPPDSGEDEIIDEILK	EAGLNITHICLPPDSSEAEIIDEILK	Q3V3R1	Q3V3R1	Mthfd1l	Monofunctional C1-tetrahydrofolate synthase, mitochondrial	yes	0	207210	0	0	0	0	2180900	2920700	2120100	1967700	488830	4654000
QIQIAQLFGVPVVVALNVFK	QIQITQLFGVPVVVALNVFK	Q3V3R1	Q3V3R1	Mthfd1l	Monofunctional C1-tetrahydrofolate synthase, mitochondrial	yes	600870	1371500	0	0	0	0	1959600	4709800	1249600	3954500	350860	3040000
ELETQISELQEDLESER	ELESQISELQEDLESER	Q8VDD5	Q8VDD5	Myh9	Myosin-9	yes	148660	0	223690	0	0	0	1161400	1220900	890040	312680	975840	2956900
HSQAVEELADQLEQTK	HSQAVEELAEQLEQTK	Q8VDD5	Q8VDD5	Myh9	Myosin-9	yes	0	227400	0	0	0	0	0	821250	2231200	3084200	605130	4365300
VISGVLQLGNIAFK	VISGVLQLGNIVFK	Q8VDD5	Q8VDD5	Myh9	Myosin-9	yes	499850	1137800	0	0	0	0	10141000	17025000	13221000	9770000	1717500	10359000
VKPLLNSIR	LLPLLNSVR	Q8VDD5;A0A2R8VKI5	Q8VDD5	Myh9	Myosin-9	no	0	333380	128000	0	0	0	1941500	0	236680	687340	176250	803360
FAISELFAK	FAITVSLSEMFAK	P09405	P09405	Ncl	Nucleolin	yes	558040	1665700	226530	0	0	0	9031700	11254000	3067900	9800100	4728200	6118700
VEGSEPTTPFNLFIGNLNPNK	VEGTEPTTAFNLFVGNLNFNK	P09405	P09405	Ncl	Nucleolin	yes	723830	2160700	522840	0	0	0	12252000	29201000	15947000	9679400	8145800	12323000
QFLLAAEAIDDIPFGITSNSGVFSK	QFLQAAEAIDDIPFGITSNSDVFSK	P09103	P09103	P4hb	Protein disulfide-isomerase	yes	0	458770	329990	0	0	0	13227000	29321000	15779000	424030	5030000	3451300
TGPAATTLSDTAAAESLVDSSEVTVIGFFK	TGPAATTLPDGAAAESLVESSEVAVIGFFK	P09103	P09103	P4hb	Protein disulfide-isomerase	yes	1520200	2575900	1118300	0	0	0	12219000	19723000	15131000	14205000	6854900	16773000
VLVGANFEEVAFDEK	VLVGKNFEDVAFDEK	P09103	P09103	P4hb	Protein disulfide-isomerase	yes	676580	391860	0	0	0	0	6590200	6904700	7513600	2140800	3316100	2060000
ALEQFLQEYFDGNLK	ALERFLQDYFDGNLK	P27773	P27773	Pdia3	Protein disulfide-isomerase A3	yes	1035700	2723700	555540	0	0	0	12733000	14339000	8204500	3794100	10405000	22890000
ALEQFLQEYFDGNLKR	ALERFLQDYFDGNLKR	P27773	P27773	Pdia3	Protein disulfide-isomerase A3	yes	320760	0	176860	0	0	0	1402600	16054000	4381500	7688800	3582400	10939000
DASVVGFFR	DASIVGFFD	P27773	P27773	Pdia3	Protein disulfide-isomerase A3	yes	151720	334060	0	0	0	0	0	0	1814800	1497500	1283900	8919500
DLLTAYYDVDYEK	DLLIAYYDVDYEK	P27773	P27773	Pdia3	Protein disulfide-isomerase A3	yes	0	270070	0	0	0	0	6660900	7471100	5682300	2030600	4641900	3865500
ELNDFISYLQR	ELSDFISYLQR	P27773	P27773	Pdia3	Protein disulfide-isomerase A3	yes	412360	1455400	0	0	0	0	6313400	16015000	8575100	4874500	3882700	12052000
FIQDSIFGLCPHMTEDNK	FIQENIFGICPHMTEDNK	P27773	P27773	Pdia3	Protein disulfide-isomerase A3	yes	0	448030	0	0	0	0	2553600	0	159810	169020	2699000	4310500
TFSHELSDFGLESTTGEVPVVAIR	TFSHELSDFGLESTAGEIPVVAIR	P27773	P27773	Pdia3	Protein disulfide-isomerase A3	yes	466560	2100800	852060	0	0	0	6254400	11065000	6201600	7232500	6277400	8760400
DGELPVEDDIDLSDVELDDLEKDEL	DGELPVEDDIDLSDVELDDLGKDEL	Q922R8;Q3TML0;F7DBQ0	Q922R8	Pdia6	Protein disulfide-isomerase A6	no	0	763440	322290	0	0	0	3093300	2696100	1053700	6469700	746160	908890
GSTAPVGGGSFPTITPR	GSTAPVGGGAFPTI	Q922R8;Q3TML0;F7DBQ0	Q922R8	Pdia6	Protein disulfide-isomerase A6	no	0	469430	368780	0	0	0	9348500	1764900	5940500	14899000	12097000	17201000
HQSLGGQYGVQGFPTIK	HHSLGGQYGVQGFPTIK	Q922R8;Q3TML0;F7DBQ0	Q922R8	Pdia6	Protein disulfide-isomerase A6	no	276580	691440	532740	0	0	0	12726000	11949000	9451100	9034400	12695000	9446800
AADISQWAGPLCLQEVDEPPQHALR	PVDLSKWSGPLSLQEVDEQPQHPLH	P70296;D3Z1V4;D6RHS6	P70296	Pebp1	Phosphatidylethanolamine-binding protein 1;Hippocampal cholinergic neurostimulating peptide	no	226270	573060	315050	0	0	0	3852200	8314700	10621000	993970	3540400	4480200
VLTPTQVMNRPSSISWDGLDPGK	VLTPTQVKNRPTSISWDGLDSGK	P70296;D3Z1V4;D6RHS6	P70296	Pebp1	Phosphatidylethanolamine-binding protein 1;Hippocampal cholinergic neurostimulating peptide	no	186190	663860	881660	0	0	0	11007000	11794000	9944000	13310000	4262600	9087800
AGWNAYIDSLMADGTCQDAAIVGYK	AGWNAYIDNLMADGTCQDAAIVGYK	P62962;Q5SX49;J3QMC2	P62962	Pfn1	Profilin-1;Profilin	no	1983600	5486700	1630400	0	0	0	12481000	45614000	28843000	24328000	4490900	20296000
DSLLQDGEFTMDLR	DSLLQDGEFSMDLR	P62962;Q5SX49	P62962	Pfn1	Profilin-1;Profilin	no	0	6580100	1731900	0	0	0	7297900	14323000	13214000	2360100	1620000	16406000
SSFFVNGLTLGGQK	SSFYVNGLTLGGQK	P62962;Q5SX49	P62962	Pfn1	Profilin-1;Profilin	no	664040	1322900	0	0	0	0	16152000	14094000	12424000	15431000	10615000	9633700
STGGAPTFNVTVTMTAK	STDGAPTFNVTVTMTAR	P62962;Q5SX49	P62962	Pfn1	Profilin-1;Profilin	no	266640	1118100	0	0	0	0	13953000	11915000	16169000	11092000	17262000	19659000
TFVSITPAEVGVLVGK	TFVNITPAEVGVLVGK	P62962;Q5SX49	P62962	Pfn1	Profilin-1;Profilin	no	1319000	4116500	4140200	0	0	0	60899000	54326000	22874000	23421000	25719000	25520000
DCVGPEVENACANPAAGTVILLENLR	DCVGPEVEKACANPAAGSVILLENLR	P09411;S4R2M7	P09411	Pgk1	Phosphoglycerate kinase 1;Phosphoglycerate kinase	no	6221100	10023000	5682900	0	0	0	53657000	91828000	83598000	24575000	19476000	70253000
TGQATVASGIPAGWMGLDCGTESSK	TGQATVASGIPAGWMGLDCGPESSK	P09411	P09411	Pgk1	Phosphoglycerate kinase 1	yes	196840	832890	645090	0	0	0	11848000	1938500	5868500	5590800	3657800	3880400
YSLEPVAAELK	YSLEPVAVELK	P09411;S4R2M7	P09411	Pgk1	Phosphoglycerate kinase 1;Phosphoglycerate kinase	no	1619000	0	1240500	0	0	0	11107000	4923700	11975000	4863400	15020000	25043000
AAPAPSLISVFSSPQELGASLAQLVAQR	AAPAPGLISVFSSSQELGAALAQLVAQR	Q9CQ60;Q8CBG6	Q9CQ60	Pgls	6-phosphogluconolactonase	no	255860	893740	196880	0	0	0	3735000	2634900	494710	5714400	4034800	687590
QALQGDAVPVFDLLILGVGPDGHTCSLFPDHPLLQER	QAFQGDSIPVFDLLILGVGPDGHTCSLFPDHPLLQER	Q9CQ60;Q8CBG6;D3Z4X1	Q9CQ60	Pgls	6-phosphogluconolactonase	no	346020	0	131560	0	0	0	3261000	3843800	4679900	1803300	2088800	1858000
VTLTLPVLNAAQSIIFVATGEGK	VTLTLPVLNAARTVIFVATGEGK	Q9CQ60;Q8CBG6;D3Z4X1	Q9CQ60	Pgls	6-phosphogluconolactonase	no	0	135720	0	0	0	0	3212700	2202800	1826400	2235100	2079800	1185100
DAVLNAWAEDVDLR	DPVQEAWAEDVDLR	P52480	P52480	Pkm	Pyruvate kinase PKM	yes	1195300	8165200	3046500	0	0	0	13675000	22378000	33470000	12777000	912440	37809000
LAPITSDPTEAAAVGAVEASFK	LAPITSDPTEATAVGAVEASFK	P52480	P52480	Pkm	Pyruvate kinase PKM	yes	1649400	4914400	1910700	0	0	0	44277000	42512000	61678000	33257000	25330000	32342000
LDIDSAPITAR	LDIDSPPITAR	A0A1L1STV8;A0A1L1SSN6;A0A1L1SUV0;A0A1L1ST52;A0A1L1SVH2;P52480;A0A1L1SU37;A0A1L1SQV8	P52480	Pkm	Pyruvate kinase PKM	no	522530	0	782250	0	0	0	11758000	244220	19823000	14517000	15668000	5147500
VNLAMDVGK	VNFAMNVGK	P52480	P52480	Pkm	Pyruvate kinase PKM	yes	0	961080	0	0	0	0	4584800	4837300	2551500	4662200	8817400	1638700
ALVPAAELLDSGVISHELYQQLQR	SLVPAAELLESRVIDRELYQQLQR	Q9QXS1;E9Q3W4;A0A3B2W7J8	Q9QXS1	Plec	Plectin	no	780190	2264000	270090	0	0	0	14018000	17519000	7137800	11071000	5878100	11750000
DDPSGQMLLLLSDAR	DDGSGQLLLPLSDAR	Q9QXS1;E9Q3W4	Q9QXS1	Plec	Plectin	no	0	221600	0	0	0	0	2059000	3507400	3555600	1591600	1454500	2065200
DLLQPEVAVALLEAQAGTGHIIDPATSAR	DLLPSDMAVALLEAQAGTGHIIDPATSAR	Q9QXS1;E9Q3W4;A0A3B2W7J8	Q9QXS1	Plec	Plectin	no	0	699700	0	0	0	0	8289800	6693600	8504900	4484900	2755600	5243900
ESADPLSAWLQDAK	ESADPLGAWLQDAR	Q9QXS1;E9Q3W4;A0A3B2W7J8	Q9QXS1	Plec	Plectin	no	267330	2002400	0	0	0	0	1805100	6862600	8045600	2554200	2213200	5344000
GLLRPSTATLLLEAQAATGFLVDPVR	GLLRATTAALLLEAQAATGFLVDPVR	Q9QXS1;E9Q3W4;A0A3B2W7J8	Q9QXS1	Plec	Plectin	no	0	398080	0	0	0	0	5918400	4060700	2514800	2098700	3674900	3531800
IISLETYNLFR	IISLETYNLLR	Q9QXS1;E9Q3W4	Q9QXS1	Plec	Plectin	no	191140	826320	182720	0	0	0	4922200	6880200	3382500	3933500	3965100	5660500
VLSGSSSEAAVPSVCFLVPPPNQEAQEAVAR	VLSSSGSEAAVPSVCFLVPPPNQEAQEAVTR	Q9QXS1;E9Q3W4;A0A3B2W7J8	Q9QXS1	Plec	Plectin	no	0	200220	0	0	0	0	2292000	3991500	2560800	1494000	235740	856310
YLQDLLAWVEENQR	YLQDLLAWVEENQH	Q9QXS1;E9Q3W4;A0A0R4J218;A0A0R4J223;A0A0R4J221;E9Q9J6;E9PW24	Q9QXS1	Plec	Plectin	no	289440	766960	184490	0	0	0	5919600	6777900	1228900	1549700	1710800	5913300
YLYGTGAVAGVYLPGSR	YLYGTGSVAGVYLPGSR	Q9QXS1;E9Q3W4	Q9QXS1	Plec	Plectin	no	30251	711610	0	0	0	0	7846000	6370100	4481900	6621900	4023400	3048500
DISLSEYK	DISLSDYK	P35700;B1AXW5;B1AXW6;B1AXW4	P35700	Prdx1	Peroxiredoxin-1	no	0	329480	0	0	0	0	0	0	1427400	0	0	0
IGYPAPNFK	IGHPAPNFK	P35700;B1AXW5;B1AXW6;B1AXW4	P35700	Prdx1	Peroxiredoxin-1	no	0	268430	0	0	0	0	9966300	2089400	2435100	1874100	8586200	5261600
LNCQVIGASVDSHFCHLAWINTPK	LNCQVIGASVDSHFCHLAWVNTPK	P35700;B1AXW5;B1AXW6;B1AXW4	P35700	Prdx1	Peroxiredoxin-1	no	1756500	1066200	0	0	0	0	23884000	24691000	14816000	6460300	1816300	4570600
QGGLGPMNIPLISDPK	QGGLGPMNIPLVSDPK	P35700;B1AXW5;B1AXW6;B1AXW4	P35700	Prdx1	Peroxiredoxin-1	no	758800	866870	611220	0	0	0	8972400	6854000	8858400	9067800	5037300	7375800
EVVDSYLPVILDMIK	EIVDSYLPVILDIIK	E9PZ00;Q8BFQ1;K3W4L3;J3QPG5;Q61207	E9PZ00	Psap	Prosaposin	no	1908900	3437700	1757800	0	0	0	6754200	21772000	11568000	5987000	7812900	17211000
QCDDFVAEYEPLLLEILVEVMDPGFVCSK	QCDQFVAEYEPVLIEILVEVMDPSFVCLK	E9PZ00;Q8BFQ1;K3W4L3;J3QPG5;Q61207	E9PZ00	Psap	Prosaposin	no	35416	72110	0	0	0	0	669670	436420	318810	2640900	1247300	1020800
IISLSQLLQEDSLNVADLSSLR	IIYLNQLLQEDSLNVADLTSLR	P97372;G3X9V0;E0CZ90	P97372	Psme2	Proteasome activator complex subunit 2	no	0	149920	124340	0	0	0	3915700	3899300	3430000	2733300	541590	2429900
LLALLALVKPEVWTLK	LSLLALVKPEVWTLK	P97372;G3X9V0;E0CZ90	P97372	Psme2	Proteasome activator complex subunit 2	no	0	293120	0	0	0	0	867940	334100	213340	229540	619670	1007900
QNLFQEADDFLCTFLPR	QNLFQEAEEFLYRFLPQ	P97372;G3X9V0;E0CZ90	P97372	Psme2	Proteasome activator complex subunit 2	no	81743	0	57645	0	0	0	473180	966490	1270600	277180	580770	488880
AAGVSVEPFWPGLFAK	AAGVNVEPFWPGLFAK	P47955	P47955	Rplp1	60S acidic ribosomal protein P1	yes	2546600	8026900	1230700	0	0	0	33592000	44538000	20970000	23949000	17520000	20758000
ALANVNIGSLICNVGAGGPAPAAGAAPAGGAAPSTAAAPAEEK	ALANVNIGSLICNVGAGGPAPAAGAAPAGGPAPSTAAAPAEEK	P47955	P47955	Rplp1	60S acidic ribosomal protein P1	yes	965900	2343400	878870	0	0	0	20208000	23147000	12472000	25292000	14093000	12859000
EDQVIQLMNTIFSK	EDQVIQLMNAIFSK	Q9DBG6;A2ACG7	Q9DBG6	Rpn2	Dolichyl-diphosphooligosaccharide--protein glycosyltransferase subunit 2	no	0	330920	0	0	0	0	3561800	1112400	594280	2042400	1884500	3033200
ELLLAAVSEDSPIAQIYHAVAALSGFGLPLASNEALGALTAR	DLLLAAVSEDSSVTQIYHAVAALSGFGLPLASQEALSALTAR	Q9DBG6;A2ACG7	Q9DBG6	Rpn2	Dolichyl-diphosphooligosaccharide--protein glycosyltransferase subunit 2	no	0	146590	41888	0	0	0	1332300	791250	842340	936010	1171300	735030
LQVSNVLSQPLAQAAVK	LQVTNVLSQPLTQATVK	Q9DBG6;A2ACG7	Q9DBG6	Rpn2	Dolichyl-diphosphooligosaccharide--protein glycosyltransferase subunit 2	no	0	426630	0	0	0	0	5280900	1387600	1542100	4365000	3710800	1156500
NFESLSEAFSVASAAAALSQNR	NFESLSEAFSVASAAAVLSHNR	Q9DBG6;A2ACG7	Q9DBG6	Rpn2	Dolichyl-diphosphooligosaccharide--protein glycosyltransferase subunit 2	no	0	130530	0	0	0	0	907130	1050800	170700	103510	1800400	1596700
TPFSLVGNVFELNFK	TSFTPVGDVFELNFM	Q9DBG6;A2ACG7	Q9DBG6	Rpn2	Dolichyl-diphosphooligosaccharide--protein glycosyltransferase subunit 2	no	0	441430	0	0	0	0	1644400	1255300	569090	550720	1449500	1523300
ARPLEEALDVIVSTFHK	ASPLEKALDVMVSTFHK	A0A0G2JGD2;P07091	P07091	S100a4	Protein S100-A4	no	69024000	36194000	17052000	0	0	0	114670000	163140000	20594000	94141000	52263000	86647000
DNEVDFQEYCVFLSCIAMMCNEFFEGCPDKEPR	DNEVDFQEYCVFLSCIAMMCNEFFEGFPDKQPR	P07091	P07091	S100a4	Protein S100-A4	yes	213880	521060	0	0	0	0	7784900	7687300	8341100	9159600	2755700	5615100
PLEEALDVIVSTFHK	PLEKALDVMVSTFHK	A0A0G2JGD2;P07091	P07091	S100a4	Protein S100-A4	no	2843100	7680900	2740800	0	0	0	66992000	37461000	36889000	13148000	20333000	14073000
DQEVNFQEYVAFLGALALIYNEALK	DQEVNFQEYVTFLGALALIYNEALK	P14069	P14069	S100a6	Protein S100-A6	yes	5489300	5642900	7483500	0	0	0	20548000	7660400	9241400	31476000	10215000	9480000
LMDDLDRNKDQEVNFQEYVAFLGALALIYNEALK	LMEDLDRNKDQEVNFQEYVTFLGALALIYNEALK	P14069	P14069	S100a6	Protein S100-A6	yes	664760	0	0	0	0	0	1879600	3390100	842310	4596100	3294300	3241600
DQAVENILLSPLVVASSLGLVSLGGK	DQAVENILVSPVVVASSLGLVSLGGK	P19324;A0A140LHR4;A0A140LHK0	P19324	Serpinh1	Serpin H1	no	856170	4653400	895960	0	0	0	22146000	18049000	10938000	13801000	10600000	15050000
LQMVEMPLAHK	LQLVEMPLAHK	P19324	P19324	Serpinh1	Serpin H1	yes	0	303910	0	0	0	0	1516000	178170	821950	2647700	3555200	4114000
ALEAFDLDPAQWGVNVQPYSGSPANLAAYTALLQPHDR	ALEAFDLDPAQWGVNVQPYSGSPANLAVYTALLQPHDR	Q9CZN7	Q9CZN7	Shmt2	Serine hydroxymethyltransferase	yes	0	413920	190610	0	0	0	5039600	4890600	250970	5207900	2782100	2800600
LNPQTGLIDYDQLALTAR	LNPKTGLIDYNQLALTAR	Q9CZN7	Q9CZN7	Shmt2	Serine hydroxymethyltransferase	yes	0	268570	0	0	0	0	1468000	2201700	1332800	0	327840	959870
GDQALSFLK	SLQALNFLK	P48962	P48962	Slc25a4	ADP/ATP translocase 1	yes	108870	155490	0	0	0	0	1001700	4239000	3515100	1177700	2702300	3923200
GMLPDPKNVHIIVSWMIAQSVTAVAGLVSYPFDTVR	GMLPDPKNVHIFVSWMIAQSVTAVAGLVSYPFDTVR	P48962	P48962	Slc25a4	ADP/ATP translocase 1	yes	0	95980	0	0	0	0	650560	1633200	0	391510	568100	591480
LINSLYPEGQAPVK	LINALYPEGQAPVK	Q9WVA4;A0A0A6YXG6	Q9WVA4	Tagln2	Transgelin-2	no	0	166720	0	0	0	0	5671300	130950	916450	2951300	912070	899450
LINSLYPEGQAPVKK	LINALYPEGQAPVKK	Q9WVA4;A0A0A6YXG6	Q9WVA4	Tagln2	Transgelin-2	no	0	0	389380	0	0	0	1215500	0	3864500	4853600	5440400	3071100
GHAAPILYAVWAEAGFLPEAELLNLR	GHAAPILYAVWAEAGFLAEAELLNLR	P40142;A0A286YE28	P40142	Tkt	Transketolase	no	256490	0	0	0	0	0	4127800	6806600	5641800	2303200	5005800	5436100
NMAEQIIQEIYSQVQSK	NMAEQIIQEIYSQIQSK	P40142	P40142	Tkt	Transketolase	yes	1438900	1628500	572220	0	0	0	14041000	17003000	8513900	9448500	7399400	8159800
CLGELICTLNAANVPAGTEVVCAPPTAYIDFAR	SLGELIGTLNAAKVPADTEVVCAPPTAYIDFAR	P17751	P17751	Tpi1	Triosephosphate isomerase	yes	1787500	4097800	2555800	0	0	0	13241000	34122000	29695000	9508200	16986000	27922000
DLGATWVVLGHSER	DCGATWVVLGHSER	P17751;H7BXC3	P17751	Tpi1	Triosephosphate isomerase	no	307870	221670	0	0	0	0	13502000	3532300	8047100	3558700	6006100	6630200
AQEQLATALQNLEEAEK	AQERLATALQKLEEAEK	Q6IRU2	Q6IRU2	Tpm4	Tropomyosin alpha-4 chain	yes	0	345290	153740	0	0	0	6892500	7354700	12006000	6424500	4126300	2015200
IQLLEEELDR	IQLVEEELDR	Q6IRU2	Q6IRU2	Tpm4	Tropomyosin alpha-4 chain	yes	0	295870	0	0	0	0	1548300	3026400	2902900	1699000	0	2216300
MEILEMQLK	MEIQEMQLK	Q6IRU2;A0A571BEU1	Q6IRU2	Tpm4	Tropomyosin alpha-4 chain	no	224650	0	0	0	0	0	4580900	3715700	2172600	2033300	2222900	3010700
LLYPYLAWLAFATVLNYYVWRDNSGR	LLYPYLAWLAFATTLNYCVWRDNHGW	P50637	P50637	Tspo	Translocator protein	yes	21945	0	0	0	0	0	129360	417210	66656	1146900	402400	602810
PESWVPAVGLTLVPSLGGFMGAYFVR	APPWVPAMGFTLAPSLGCFVGSRFV	P50637;A0A140LIU9	P50637	Tspo	Translocator protein	no	326770	2626200	0	0	0	0	10421000	3671100	5493300	4288400	3191400	2361100
QMGWALADLLLVSGVATATTLAWHR	QMGWALVDLLLVSGAAAATTVAW	P50637	P50637	Tspo	Translocator protein	yes	0	478390	0	0	0	0	1399600	644060	2211500	756350	1205700	1383500
EQIVVDLSHPGVSADDQVSR	EQIVVDLSHPGVSEDDQVSR	O70475	O70475	Ugdh	UDP-glucose 6-dehydrogenase	yes	130740	100600	0	0	0	0	3183300	1917500	2003400	2362700	3437200	780860
NLFFSTNIDDAIR	NLFFSTNIDDAIK	O70475;D3YXP9	O70475	Ugdh	UDP-glucose 6-dehydrogenase	no	200270	0	0	0	0	0	3817800	2854100	2424800	3422400	3398900	6387500
ACGLNFADLMGR	ACGLNFADLMAR	Q62465	Q62465	Vat1	Synaptic vesicle membrane protein VAT-1 homolog	yes	138570	492050	0	0	0	0	6082100	5345300	7651600	4368300	5365600	6179200
LQSRPAVPPAPGPGQLTLR	LQSRPAAPPAPGPGQLTLR	Q62465	Q62465	Vat1	Synaptic vesicle membrane protein VAT-1 homolog	yes	0	0	134870	0	0	0	0	107600	1626200	1628700	1088700	2858600
LVALYNQGHIKPR	LLALYNQGHIKPH	Q62465	Q62465	Vat1	Synaptic vesicle membrane protein VAT-1 homolog	yes	0	0	183740	0	0	0	765800	0	892270	740680	617550	460780
